# Supplementary material for: Direct synthesis of phthalimides via palladium-catalysed double carbonylation of o-dihaloarenes with nitroarenes
Source: Royal Society of Chemistry journal article supplement (doi:10.1039/d3cc04126c), 2023-01-01

## Supporting Information

### Direct Synthesis of Phthalimides via Palladium-Catalyzed Double Carbonylation of *o*-Dihaloarenes with Nitroarenes

Chenwei Liu,<sup>a</sup> Tongshun An,<sup>a</sup> Weiheng Yuan,<sup>a</sup> Huiying Dai,<sup>a</sup> Xiaolan Liang,<sup>a</sup> Zhiping Yin,<sup>\*a</sup>

<sup>a</sup>School of Pharmacy, Jiangsu University, Zhenjiang 212013, P. R. China,

E-mail: zhiping\_yin@ujs.edu.cn

#### Contents

|                                                                                                            |    |
|------------------------------------------------------------------------------------------------------------|----|
| 1. General Comments .....                                                                                  | 2  |
| 2. Experimental Setup .....                                                                                | 2  |
| 2.1.1 Preparation of 2-iodophenyl trifluoromethanesulfonate.....                                           | 2  |
| 2.1.2 Preparation of 2-iodo- <i>N</i> -phenylbenzamide .....                                               | 3  |
| 2.2.1 Solvents optimization of <i>o</i> -diiodobenzene .....                                               | 3  |
| 2.2.2 Bases and solvents optimization of 1-bromo-2-iodobenzene .....                                       | 4  |
| 2.2.3 Reaction conditions optimization of 2-iodophenyl trifluoromethanesulfonate.....                      | 5  |
| 2.3 Failed examples.....                                                                                   | 6  |
| 2.4 General Procedures for the palladium-catalyzed aminocarbonylation of aromatic nitro<br>compounds:..... | 6  |
| 3. Analytical Data .....                                                                                   | 7  |
| 4. References .....                                                                                        | 12 |
| 5. NMR Spectroscopic Data for Products.....                                                                | 14 |

## 1. General Comments

Chemicals were purchased from Adamas, Bidepharm., TCI, Aladdin and used as such unless stated otherwise. All solvents like acetonitrile, tetrahydrofuran, *N,N*-dimethylmethanamide, 1,4-dioxane were purchased from Adamas (Water  $\leq$  30 ppm (by K.F.), 99.9%, SafeDry, with molecular sieves, Safeseal). NMR spectra were recorded on Bruker AV 400 or Bruker Fourier 300 spectrometer. Chemical shifts (ppm) are given relative to TMS (0.00 ppm) for  $^1\text{H}$  and  $\text{CDCl}_3$  (77.0 ppm) for  $^{13}\text{C}$  solvent. Multiplets were assigned as s (singlet), d (doublet), t (triplet), q (quartet), p (pentet), dd (doublet of doublet), m (multiplet) and br.s (broad singlet). Infrared spectra were obtained using KBr plates on a Nicolet Avatar 370 DTGS. High-resolution mass spectra HRMS spectra were recorded on a Thermo Scientific Exactive Orbitrap Mass Spectrometer under Electron Spray Ionization conditions preparing sample solution in methanol. The data are given as mass units per charge ( $m/z$ ). GC yields were calculated using hexadecane as an internal standard. Gas chromatography analysis was performed on an Agilent 6820 instrument with an FID detector and HP-5 capillary column (polydimethylsiloxane with 5% phenyl groups, 30 m, 0.32 mm i.d. 0.25  $\mu\text{m}$  film thickness) using nitrogen as carrier gas. The products were isolated from the reaction mixture by column chromatography on silica gel., 54-74  $\mu\text{m}$ , 200-300 mesh (Yucheng Chemical CO., LTD, Shanghai).

**NOTE:** a) As carbon monoxide will be released from  $\text{Mo}(\text{CO})_6$ , the reactions should only be handled in a well-ventilated fume hood and the laboratory should be well-equipped with a CO detector and alarm system; b) The reaction was conducted under reflux conditions (temperature is higher than the boiling point of 1,4-dioxane).

## 2. Experimental Setup

### 2.1.1 Preparation of 2-iodophenyl trifluoromethanesulfonate.<sup>1</sup>

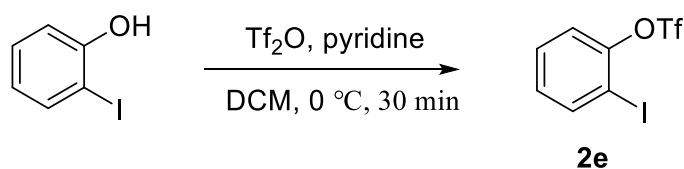

To the 2-iodophenol (1 mmol) in anhyd.  $\text{CH}_2\text{Cl}_2$  was added pyridine (2 mmol) and the solution was cooled to 0  $^\circ\text{C}$ . Trifluoromethanesulfonic anhydride (1.2 mmol) was added dropwise and the mixture was warmed to r.t. The reaction was complete within 5 min as shown by TLC. The mixture was diluted

with Et<sub>2</sub>O, quenched with 10% aq HCl and washed successively with sat. NaHCO<sub>3</sub>, and brine. After drying (MgSO<sub>4</sub>) the solvent was evaporated and the residue was purified by column chromatography on silica gel using petroleum ether or mixtures of petroleum ether and Et<sub>2</sub>O as eluent to give the triflates product **2e** as colorless to pale yellow clear liquids in 90% yield.

### 2.1.2 Preparation of 2-iodo-*N*-phenylbenzamide.<sup>2</sup>

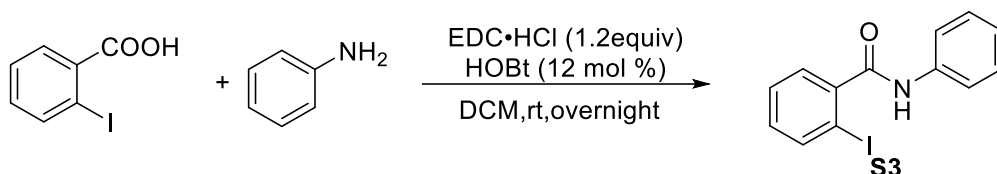

Into an oven-dried 50 mL round-bottom flask equipped with a magnetic stirring bar and a rubber stopper were added EDC·HCl (1.40 g, 6.0 mmol, 1.2 equiv), HOBT (0.097 g, 0.72 mmol, 0.12 equiv), 2-iodobenzoic acid (6.0 mmol) and DCM (30 mL). Primary amine (7.2 mmol, 1.2 equiv) was then added into the flask, and the mixture was stirred at room temperature overnight. After the reaction finished, the mixture was diluted with DCM, washed successively with water, aqueous HCl solution (1.0 M), saturated aqueous NaHCO<sub>3</sub> solution and brine. The organic phases were dried over anhydrous MgSO<sub>4</sub>, and then concentrated under reduced pressure on a rotary evaporator. The residual was purified by column chromatography on silica gel (eluent: PE and EA) to afford the pure product **S3**.

### 2.2.1 Solvents optimization for carbonylation of *o*-diiodobenzene with nitrobenzene

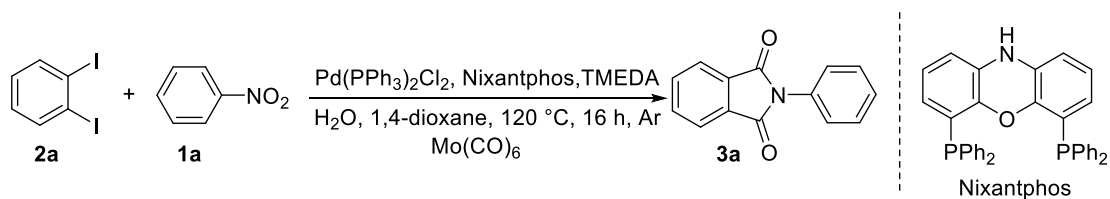

| entry | solvent            | yield (%) |
|-------|--------------------|-----------|
| 1     | CH <sub>3</sub> CN | 50        |
| 2     | THF                | trace     |
| 3     | DCE                | 11        |
| 4     | toluene            | 27        |
| 5     | PhCF <sub>3</sub>  | 31        |



(<sup>a</sup> Reaction conditions: **1a** (0.3 mmol, 1.5 equivalent), **2a** (0.2 mmol), Pd(PPh<sub>3</sub>)<sub>2</sub>Cl<sub>2</sub> (7.0 mg, 5 mol%), Nixantphos (11.0 mg, 10 mol%), Mo(CO)<sub>6</sub> (79.2 mg, 0.3 mmol, 1.5 equivalent), DABCO (4.0 equivalent, 0.8 mmol, 120 μL), and H<sub>2</sub>O (18 μL 1.0 mmol 5.0 equivalent), and solvent (2 mL), 120 °C, under Ar, 16 h, GC yield, using hexadecane as the internal standard. <sup>b</sup> isolated yield.)

### 2.2.3 Reaction conditions optimization for carbonylation of 2-iodophenyl trifluoromethanesulfonate with nitrobenzene <sup>a</sup>

trifluoromethanesulfonate with nitrobenzene <sup>a</sup>

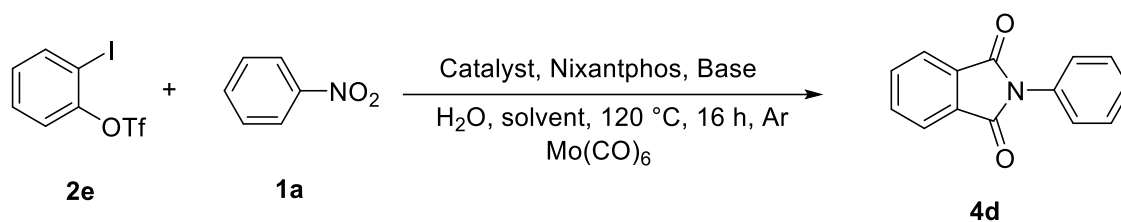

| entry | catalyst                                              | base                     | solvent            | yield (%)             |
|-------|-------------------------------------------------------|--------------------------|--------------------|-----------------------|
| 1     | Pd(PPh <sub>3</sub> ) <sub>2</sub> Cl <sub>2</sub> 5% | DABCO 4.0 eq             | 1,4-dioxane        | Trace                 |
| 2     | Pd(PPh <sub>3</sub> ) <sub>2</sub> Cl <sub>2</sub> 5% | Et <sub>3</sub> N 4.0 eq | 1,4-dioxane        | Trace                 |
| 3     | Pd(PPh <sub>3</sub> ) <sub>2</sub> Cl <sub>2</sub> 5% | TMEDA 4.0 eq             | 1,4-dioxane        | Trace                 |
| 4     | Pd(PPh <sub>3</sub> ) <sub>2</sub> Cl <sub>2</sub> 5% | DIPEA 4.0 eq             | 1,4-dioxane        | 18%                   |
| 5     | Pd(PPh <sub>3</sub> ) <sub>2</sub> Cl <sub>2</sub> 5% | DIPEA 4.0eq              | PhMe               | Trace                 |
| 6     | Pd(PPh <sub>3</sub> ) <sub>2</sub> Cl <sub>2</sub> 5% | DIPEA 4.0eq              | DMF                | Trace                 |
| 7     | Pd(PPh <sub>3</sub> ) <sub>2</sub> Cl <sub>2</sub> 5% | DIPEA 4.0eq              | CH <sub>3</sub> CN | 28                    |
| 8     | Pd(TFA) <sub>2</sub> 5%                               | DIPEA 4.0eq              | CH <sub>3</sub> CN | 35                    |
| 9     | Pd(PPh <sub>3</sub> ) <sub>2</sub> Cl <sub>2</sub> 5% | DIPEA 4.0eq              | CH <sub>3</sub> CN | 50 (44 <sup>b</sup> ) |

(<sup>a</sup> Reaction conditions: **1a** (0.3 mmol, 1.5 equivalent), **2a** (0.2 mmol), Pd(PPh<sub>3</sub>)<sub>2</sub>Cl<sub>2</sub> (7.0 mg, 5 mol%), Nixantphos (11.0 mg, 10 mol%), Mo(CO)<sub>6</sub> (79.2 mg, 0.3 mmol, 1.5 equivalent), and H<sub>2</sub>O (18 μL 1.0 mmol 5.0 equivalent), and solvent (2 mL), 120 °C, under Ar, 16 h, GC yields, using hexadecane as the internal standard. <sup>b</sup> isolated yield)

### 2.3 Failed examples

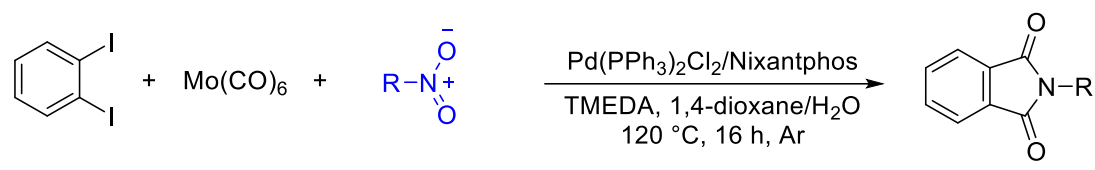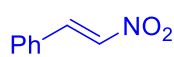

0%

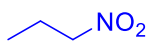

0%

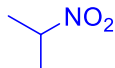

0%

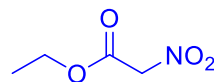

0%

### 2.4 General Procedures for the palladium-catalyzed carbonylation of *o*-dihaloarenes with nitroarenes:

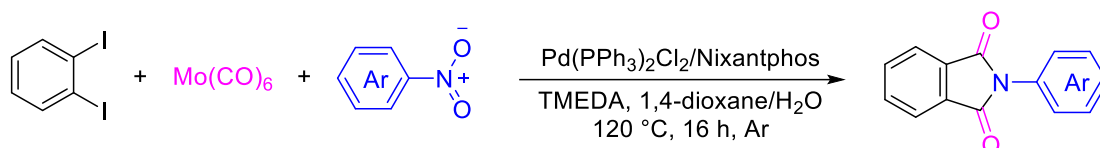

A flame-dried resealable Schlenk tube (10 mL) was added with aromatic nitro compounds **1a-1s** (0.2 mmol), Mo(CO)6 (79.2 mg, 1.5 equivalent, 0.3 mmol), Pd(PPh3)2Cl2 (7.0 mg, 5 mol%), Nixantphos (10 mol%, 11.0 mg). The Schlenk tube was capped with a rubber septum, evacuated, and backfilled with argon three times. The liquid 1,2-diiodobenzene (0.3 mmol, 1.5 eq, 40  $\mu\text{L}$ ), TMEDA (4.0 equivalent, 0.8 mmol, 120  $\mu\text{L}$ ), H2O (5.0 equivalent, 18  $\mu\text{L}$ ), and solvent 1,4-dioxane (2 mL) were added through the septum, then the septum was replaced with a Teflon screwcap quickly. The Schlenk tube was put into an aluminum heating block and stirred at 120  $^\circ\text{C}$  for 16 hours. After the reaction was completed, the reaction mixture was cooled to room temperature, diluted with ethyl acetate, and concentrated in vacuo. The crude material was purified by column chromatography on silica gel (eluent: PE and EA) to give the target product **3a-3s**.

### 3. Analytical Data

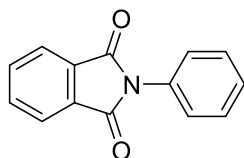

**2-Phenylisoindoline-1,3-dione (3a)**, 40.6 mg, white solid, yield: 91%; mp = 209-210 °C; Rf = 0.51 (petroleum ether / ethyl acetate = 5:1)

<sup>1</sup>H NMR (400 MHz, CDCl<sub>3</sub>) δ 7.95 (dd, *J* = 5.5, 3.1 Hz, 2H), 7.79 (dd, *J* = 5.5, 3.0 Hz, 2H), 7.63 – 7.34 (m, 5H).

<sup>13</sup>C NMR (101 MHz, CDCl<sub>3</sub>) δ 167.30, 134.42, 131.79, 131.71, 129.14, 128.13, 126.60, 123.77.

The analytical data are consistent with those reported in the literature.<sup>3,11</sup>

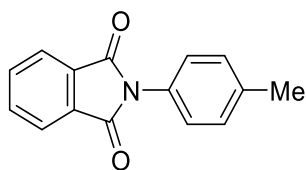

**2-(p-Tolyl)isoindoline-1,3-dione (3b)**, 42.3 mg, white solid, yield: 89%; mp = 205-206 °C; Rf = 0.51 (petroleum ether / ethyl acetate = 5:1)

<sup>1</sup>H NMR (400 MHz, CDCl<sub>3</sub>) δ 7.96 (dd, *J* = 5.5, 3.1 Hz, 2H), 7.80 (dd, *J* = 5.4, 3.0 Hz, 2H), 7.46 – 7.29 (m, 3H), 7.21 (d, *J* = 7.7 Hz, 1H), 2.22 (s, 3H).

<sup>13</sup>C NMR (101 MHz, CDCl<sub>3</sub>) δ 167.40, 138.14, 134.27, 131.77, 129.73, 128.91, 126.42, 123.64, 21.17.

The analytical data are consistent with those reported in the literature.<sup>3,11</sup>

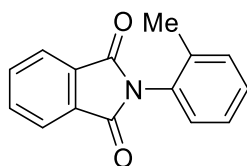

**2-(o-Tolyl)isoindoline-1,3-dione (3c)**, 18 mg, white solid, yield: 38%; mp = 180-183 °C; Rf = 0.51 (petroleum ether / ethyl acetate = 5:1)

<sup>1</sup>H NMR (400 MHz, CDCl<sub>3</sub>) δ 7.88 (dd, *J* = 5.5, 3.1 Hz, 2H), 7.72 (dd, *J* = 5.4, 3.0 Hz, 2H), 7.34 – 7.10 (m, 4H), 2.14 (s, 3H).

<sup>13</sup>C NMR (101 MHz, CDCl<sub>3</sub>) δ 167.33, 136.51, 134.30, 131.99, 131.13, 130.54, 129.43, 128.69, 126.86, 123.74, 18.02.

The analytical data are consistent with those reported in the literature.<sup>3,12</sup>

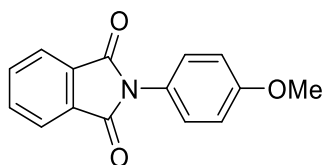

**2-(4-Methoxyphenyl)isoindoline-1,3-dione (3d)**, 46.6 mg, white solid, yield: 92%; mp = 160-161 °C; Rf = 0.42 (petroleum ether / ethyl acetate = 3:1)

<sup>1</sup>H NMR (400 MHz, CDCl<sub>3</sub>) δ 7.94 (dd, *J* = 5.4, 3.1 Hz, 2H), 7.78 (dd, *J* = 5.5, 3.0 Hz, 2H), 7.33 (d, *J* = 9.0 Hz, 2H), 7.02 (d, *J* = 9.0 Hz, 2H), 3.85 (s, 3H).

$^{13}\text{C}$  NMR (101 MHz,  $\text{CDCl}_3$ )  $\delta$  167.48, 159.15, 134.23, 131.71, 127.86, 124.17, 123.56, 114.37, 55.42.

The analytical data are consistent with those reported in the literature.<sup>3,11</sup>

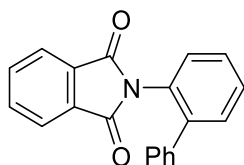

**2-((1,1'-Biphenyl)-3-yl)isoindoline-1,3-dione (3e)**, 38.9 mg, white solid, yield: 65%; mp = 165-166 °C; Rf = 0.32 (petroleum ether / ethyl acetate = 5:1)

$^1\text{H}$  NMR (400 MHz,  $\text{CDCl}_3$ )  $\delta$  7.81 (dd,  $J$  = 5.5, 3.1 Hz, 2H), 7.70 (dd,  $J$  = 5.5, 3.1 Hz, 2H), 7.58 – 7.46 (m, 3H), 7.38 – 7.31 (m, 1H), 7.30 – 7.21 (m, 5H).

$^{13}\text{C}$  NMR (101 MHz,  $\text{CDCl}_3$ )  $\delta$  167.45, 141.64, 138.82, 134.12, 131.71, 130.92, 129.61, 129.34, 128.45, 128.32, 128.07, 127.43, 123.62.

The analytical data are consistent with those reported in the literature.<sup>7</sup>

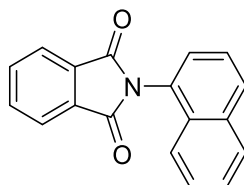

**2-(Naphthalen-1-yl)isoindoline-1,3-dione (3f)**, 30 mg, white solid, yield: 40%; mp = 182-185 °C; Rf = 0.28 (petroleum ether / ethyl acetate = 5:1)

$^1\text{H}$  NMR (400 MHz,  $\text{CDCl}_3$ )  $\delta$  8.06 – 7.97 (m, 3H), 7.95 (d,  $J$  = 7.7 Hz, 1H), 7.85 (dd,  $J$  = 5.4, 3.1 Hz, 2H), 7.66 – 7.58 (m, 2H), 7.57 – 7.44 (m, 3H).

$^{13}\text{C}$  NMR (101 MHz,  $\text{CDCl}_3$ )  $\delta$  167.80, 134.48, 134.42, 131.98, 130.24, 129.95, 128.58, 128.12, 127.12, 126.97, 126.54, 125.40, 123.94, 122.40.

The analytical data are consistent with those reported in the literature.<sup>6,13</sup>

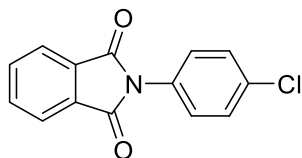

**2-(4-Chlorophenyl)isoindoline-1,3-dione (3g)**, 48.5 mg, white solid, yield: 94%; mp = 182-183 °C; Rf = 0.51 (petroleum ether / ethyl acetate = 5:1)

$^1\text{H}$  NMR (400 MHz,  $\text{CDCl}_3$ )  $\delta$  7.96 (dd,  $J$  = 5.5, 3.1 Hz, 2H), 7.80 (dd,  $J$  = 5.5, 3.1 Hz, 2H), 7.48 (d,  $J$  = 8.9 Hz, 2H), 7.41 (d,  $J$  = 8.8 Hz, 2H).

$^{13}\text{C}$  NMR (101 MHz,  $\text{CDCl}_3$ )  $\delta$  166.92, 134.51, 133.72, 131.53, 130.15, 129.24, 127.61, 123.79.

The analytical data are consistent with those reported in the literature.<sup>3,11</sup>

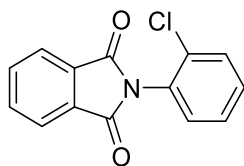

**2-(2-Chlorophenyl)isoindoline-1,3-dione (3h)**, 25.2 mg, white solid, yield: 49%; mp = 143-145 °C; Rf = 0.51 (petroleum ether / ethyl acetate = 5:1)



$^1\text{H}$  NMR (400 MHz,  $\text{CDCl}_3$ )  $\delta$  7.97 (dd,  $J = 5.4, 3.1$  Hz, 2H), 7.81 (dd,  $J = 5.5, 3.1$  Hz, 2H), 7.64 – 7.52 (m, 1H), 7.46 – 7.40 (m, 2H), 7.39 – 7.32 (m, 1H).

$^{13}\text{C}$  NMR (101 MHz,  $\text{CDCl}_3$ )  $\delta$  166.65, 134.49, 133.25, 131.93, 130.68, 130.45, 129.65, 127.74, 123.98.

The analytical data are consistent with those reported in the literature.<sup>3,14</sup>

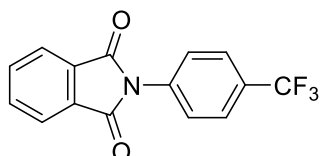

**2-(4-(trifluoromethyl)phenyl)isoindoline-1,3-dione (3i)**, 44.2 mg, white solid, yield: 76%; mp = 257-259 °C; Rf = 0.53 (petroleum ether / ethyl acetate = 5:1)

$^1\text{H}$  NMR (400 MHz, Chloroform- $d$ )  $\delta$  7.99 (dd,  $J = 5.5, 3.1$  Hz, 2H), 7.84 (q,  $J = 3.2, 2.4$  Hz, 2H), 7.78 (d,  $J = 8.4$  Hz, 2H), 7.65 (d,  $J = 8.3$  Hz, 2H).

$^{13}\text{C}$  NMR (101 MHz,  $\text{CDCl}_3$ )  $\delta$  166.76, 134.75, 131.48, 129.96, 129.63, 127.82 (q,  $J_{\text{C-F}} = 272.7$  Hz), 126.43, 126.21 (q,  $J_{\text{C-F}} = 4.04$  Hz), 124.01.

$^{19}\text{F}$  NMR (376 MHz,  $\text{CDCl}_3$ )  $\delta$  -62.59.

The analytical data are consistent with those reported in the literature.<sup>3,15</sup>

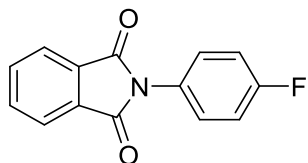

**2-(4-Fluorophenyl)isoindoline-1,3-dione (3j)**, 34.7 mg, white solid, yield: 72%; mp = 180-191 °C; Rf = 0.55 (petroleum ether / ethyl acetate = 5:1)

$^1\text{H}$  NMR (400 MHz,  $\text{CDCl}_3$ )  $\delta$  7.89 (dd,  $J = 5.7, 3.2$  Hz, 2H), 7.83 – 7.69 (m, 2H), 7.52 – 7.27 (m, 2H), 7.25 – 7.03 (m, 2H).

$^{13}\text{C}$  NMR (101 MHz,  $\text{CDCl}_3$ )  $\delta$  167.21, 161.92 (d,  $J_{\text{C-F}} = 249.47$  Hz), 134.51, 131.59, 128.36 (d,  $J_{\text{C-F}} = 8.08$  Hz), 127.51 (d,  $J_{\text{C-F}} = 3.03$  Hz), 123.81, 116.14 (d,  $J_{\text{C-F}} = 23.23$  Hz).

$^{19}\text{F}$  NMR (376 MHz,  $\text{CDCl}_3$ )  $\delta$  -113.01.

The analytical data are consistent with those reported in the literature.<sup>3,16</sup>

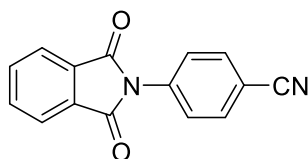

**4-(1,3-Dioxoisoindolin-2-yl)benzonitrile (3k)**, 40.7 mg, white solid, yield: 82%; mp = 184-186 °C; Rf = 0.31 (petroleum ether / ethyl acetate = 5:1)

$^1\text{H}$  NMR (400 MHz,  $\text{CDCl}_3$ )  $\delta$  7.99 (dd,  $J = 5.5, 3.0$  Hz, 2H), 7.97 – 7.76 (m, 4H), 7.69 (dd,  $J = 8.7, 1.9$  Hz, 2H).

$^{13}\text{C}$  NMR (101 MHz,  $\text{CDCl}_3$ )  $\delta$  166.45, 134.92, 132.93, 131.34, 126.45, 124.10, 118.23, 111.30.

The analytical data are consistent with those reported in the literature.<sup>3,17</sup>

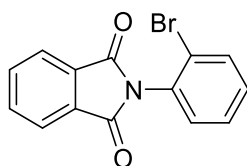

**2-(2-Bromophenyl)isoindoline-1,3-dione (3l)**, 24.1 mg, white solid, yield: 40%; mp = 63-65 °C; Rf = 0.51 (petroleum ether / ethyl acetate = 5:1)

<sup>1</sup>H NMR (400 MHz, CDCl<sub>3</sub>) δ 7.98 (td, J = 5.7, 2.7 Hz, 2H), 7.82 (dt, J = 5.4, 3.1 Hz, 2H), 7.79 – 7.71 (m, 1H), 7.47 (t, J = 7.4 Hz, 1H), 7.37 (dt, J = 9.1, 5.1 Hz, 2H).

<sup>13</sup>C NMR (101 MHz, CDCl<sub>3</sub>) δ 166.65, 134.52, 133.61, 131.91, 131.41, 130.97, 130.85, 128.47, 124.02, 123.37.

The analytical data are consistent with those reported in the literature.<sup>4,18</sup>

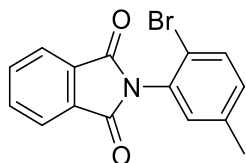

**2-(2-Bromo-5-methylphenyl)isoindoline-1,3-dione (3m)**, 17 mg, white solid, yield: 27%; mp = 175-178 °C; Rf = 0.51 (petroleum ether / ethyl acetate = 5:1)

<sup>1</sup>H NMR (400 MHz, CDCl<sub>3</sub>) δ 7.97 (dd, J = 5.5, 3.1 Hz, 2H), 7.81 (dd, J = 5.5, 3.1 Hz, 2H), 7.65 – 7.57 (m, 1H), 7.21 – 7.11 (m, 2H), 2.37 (s, 3H).

<sup>13</sup>C NMR (101 MHz, CDCl<sub>3</sub>) δ 166.70, 138.80, 134.44, 133.12, 131.89, 131.85, 131.33, 130.96, 123.93, 119.74, 20.83.

IR (neat) cm<sup>-1</sup> 2923, 1747, 1589, 1472, 1364, 1231, 1082, 1035, 872, 815, 717, 530.

HRMS: (ESI-TOF) Calc. for C<sub>16</sub>H<sub>11</sub>Br<sup>79</sup>NO<sub>2</sub> [M+H]<sup>+</sup>: 315.9968; found: 315.9962. C<sub>16</sub>H<sub>11</sub>Br<sup>81</sup>NO<sub>2</sub> [M+H]<sup>+</sup>: 317.9948; found: 317.9942.

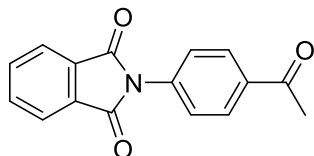

**2-(4-Acetylphenyl)isoindoline-1,3-dione (3n)**, 31.3 mg, white solid, yield: 59%; mp = 245-247 °C; Rf = 0.39 (petroleum ether / ethyl acetate = 5:1)

<sup>1</sup>H NMR (400 MHz, CDCl<sub>3</sub>) δ 8.17 – 8.06 (m, 2H), 7.98 (dd, J = 5.5, 3.1 Hz, 2H), 7.83 (dd, J = 5.5, 3.1 Hz, 2H), 7.67 – 7.56 (m, 2H), 2.65 (s, 3H).

<sup>13</sup>C NMR (101 MHz, CDCl<sub>3</sub>) δ 197.30, 166.78, 136.09, 135.99, 134.70, 131.61, 129.16, 126.09, 123.97, 26.65.

The analytical data are consistent with those reported in the literature.<sup>9,18</sup>

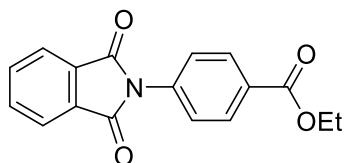

**Ethyl 4-(1,3-dioxisoindolin-2-yl)benzoate (3o)**, 39.5 mg, white solid, yield: 67%; mp = 130-132 °C; Rf = 0.8 (petroleum ether / ethyl acetate = 4:1)

<sup>1</sup>H NMR (400 MHz, CDCl<sub>3</sub>) δ 8.26 – 8.10 (m, 2H), 7.96 (dd, J = 5.5, 3.0 Hz, 2H), 7.80 (dd, J = 5.5, 3.1 Hz, 2H), 7.69 – 7.40 (m, 2H), 4.40 (q, J = 7.1 Hz, 2H), 1.40 (t, J = 7.1 Hz, 3H).

<sup>13</sup>C NMR (101 MHz, CDCl<sub>3</sub>) δ 166.76, 165.79, 135.70, 134.62, 131.53, 130.33, 129.62, 125.86, 123.87, 61.15, 14.28.

The analytical data are consistent with those reported in the literature.<sup>3,19</sup>

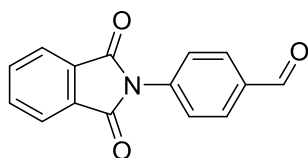

**4-(1,3-dioxoisindolin-2-yl)benzaldehyde (3p)**, 40.2 mg, white solid, yield: 80%); mp = 345-348 °C; Rf = 0.31 (petroleum ether / ethyl acetate = 5:1)

<sup>1</sup>H NMR (400 MHz, (CD<sub>3</sub>)<sub>2</sub>SO) δ 10.16 (s, 1H), 8.20 – 8.15 (m, 2H), 8.10 (dd, J = 5.5, 3.1 Hz, 2H), 8.03 (dd, J = 5.5, 3.1 Hz, 2H), 7.85 – 7.80 (m, 2H).

<sup>13</sup>C NMR (101 MHz, (CD<sub>3</sub>)<sub>2</sub>SO) δ 192.90, 167.04, 137.60, 135.53, 135.37, 131.95, 130.42, 127.93, 124.07.

The analytical data are consistent with those reported in the literature.<sup>10,20</sup>

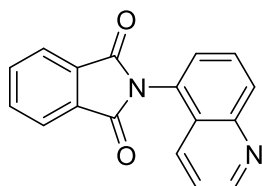

**2-(Quinolin-5-yl)isoindoline-1,3-dione (3q)**, 32.9 mg, white solid, yield: 60%); mp = 206-208 °C; Rf = 0.21 (petroleum ether / ethyl acetate = 5:1)

<sup>1</sup>H NMR (400 MHz, CDCl<sub>3</sub>) δ 8.99 (s, 1H), 8.28 (d, J = 8.6 Hz, 1H), 8.09 – 7.95 (m, 3H), 7.94 – 7.81 (m, 3H), 7.55 (d, J = 7.4 Hz, 1H), 7.48 – 7.40 (m, 1H),.

<sup>13</sup>C NMR (101 MHz, CDCl<sub>3</sub>) δ 167.61, 150.89, 148.75, 134.78, 131.82, 131.35, 131.30, 129.00, 128.04, 127.50, 125.72, 124.14, 121.88.

The analytical data are consistent with those reported in the literature.<sup>5</sup>

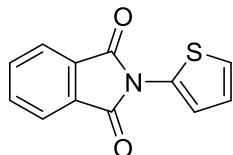

**2-(Thiophen-2-yl)isoindoline-1,3-dione (3r)**, 20.6 mg, yellow solid, yield: 45%); mp = 196-198 °C; Rf = 0.51 (petroleum ether / ethyl acetate = 5:1)

<sup>1</sup>H NMR (400 MHz, CDCl<sub>3</sub>) δ 7.99 – 7.87 (m, 2H), 7.87 – 7.77 (m, 2H), 7.53 (dd, J = 3.9, 1.4 Hz, 1H), 7.22 (dd, J = 5.5, 1.3 Hz, 1H), 7.06 (dd, J = 5.5, 3.8 Hz, 1H).

<sup>13</sup>C NMR (101 MHz, CDCl<sub>3</sub>) δ 13C NMR (101 MHz, CDCl<sub>3</sub>) δ 166.00, 134.66, 131.42, 125.28, 123.92, 123.72, 121.95, 120.44.

The analytical data are consistent with those reported in the literature.<sup>4</sup>

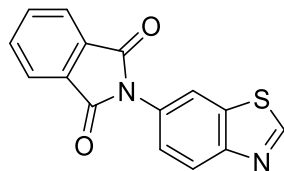

**2-(Benzo[d]thiazol-6-yl)isoindoline-1,3-dione (3s)**, 44.6 mg, white solid, yield: 80%); mp = 227-228 °C; Rf = 0.21 (petroleum ether / ethyl acetate = 5:1)

<sup>1</sup>H NMR (400 MHz, CDCl<sub>3</sub>) δ 9.06 (s, 1H), 8.25 (d, J = 8.7 Hz, 1H), 8.07 (d, J = 2.0 Hz, 1H), 7.98 (dd, J = 5.4, 3.0 Hz, 2H), 7.81 (dd, J = 5.5, 3.1 Hz, 2H), 7.62 (dd, J = 8.7, 2.0 Hz, 1H).

$^{13}\text{C}$  NMR (101 MHz,  $\text{CDCl}_3$ )  $\delta$  167.19, 155.23, 152.52, 134.57, 134.20, 131.58, 129.15, 124.89, 123.92, 123.86, 120.15.

The analytical data are consistent with those reported in the literature.<sup>6</sup>

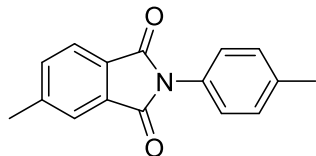

**5-Methyl-2-(p-tolyl)isoindoline-1,3-dione (4b)**, 30 mg, white solid, yield: 60%

$^1\text{H}$  NMR (400 MHz,  $\text{CDCl}_3$ )  $\delta$  7.78 – 7.71 (m, 1H), 7.65 (s, 1H), 7.48 (d,  $J = 7.2$  Hz, 1H), 7.22 (d,  $J = 3.2$  Hz, 4H), 2.45 (s, 3H), 2.32 (s, 3H).

$^{13}\text{C}$  NMR (101 MHz,  $\text{CDCl}_3$ )  $\delta$  167.55, 167.43, 145.59, 137.97, 134.82, 132.14, 129.67, 129.17, 129.05, 126.39, 124.11, 123.53, 21.99, 21.15.

The analytical data are consistent with those reported in the literature.<sup>3</sup>

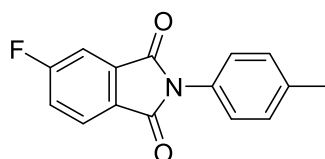

**5-Fluoro-2-(p-tolyl)isoindoline-1,3-dione (4f)**, 44.9 mg, white solid, yield: 88%; mp = 180-182 °C; Rf = 0.51 (petroleum ether / ethyl acetate = 5:1)

$^1\text{H}$  NMR (400 MHz,  $\text{CDCl}_3$ )  $\delta$  7.90 (dd,  $J = 8.2, 4.5$  Hz, 1H), 7.63 – 7.52 (m, 1H), 7.44 – 7.36 (m, 1H), 7.31 – 7.21 (m, 4H), 2.37 (s, 3H).

$^{13}\text{C}$  NMR (101 MHz,  $\text{CDCl}_3$ )  $\delta$  166.50 (d,  $J_{\text{C-F}} = 258.56$  Hz), 166.31, 166.00 (d,  $J_{\text{C-F}} = 2.02$  Hz), 138.34, 134.60 (d,  $J_{\text{C-F}} = 9.09$  Hz), 129.78, 128.72, 127.52 (d,  $J_{\text{C-F}} = 3.03$  Hz), 126.30, 126.07 (d,  $J_{\text{C-F}} = 9.09$  Hz), 121.35 (d,  $J_{\text{C-F}} = 23.23$  Hz), 111.39 (d,  $J_{\text{C-F}} = 25.25$  Hz), 21.17.

$^{19}\text{F}$  NMR (376 MHz,  $\text{CDCl}_3$ )  $\delta$  -101.19.

The analytical data are consistent with those reported in the literature.<sup>8</sup>

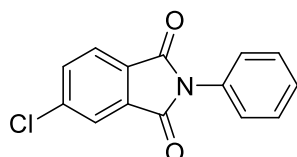

**5-Chloro-2-phenylisoindoline-1,3-dione (4g)**, 37 mg, white solid, yield: 72%; mp = 175-176 °C; Rf = 0.72 (petroleum ether / ethyl acetate = 5:1)

$^1\text{H}$  NMR (400 MHz,  $\text{CDCl}_3$ )  $\delta$  7.99 – 7.85 (m, 2H), 7.75 (dd,  $J = 7.9, 1.9$  Hz, 1H), 7.55 – 7.48 (m, 2H), 7.42 (d,  $J = 7.4$  Hz, 3H).

$^{13}\text{C}$  NMR (101 MHz,  $\text{CDCl}_3$ )  $\delta$  166.25, 165.94, 141.06, 134.43, 133.36, 131.35, 129.75, 129.13, 128.26, 126.41, 124.97, 124.11.

The analytical data are consistent with those reported in the literature.<sup>4,16</sup>

#### 4. References

1. Huffman, J.; Thompson, A.; Kabalka, G.; Akula, M., *Synthesis* **2005**, 4, 547-550.
2. Wu, D.; Jiang, M.; Wang, J.-J.; Yu, W., *Organic Letters* **2023**, 25 (12), 2073-2077.
3. Shi, R.; Liao, F.; Niu, H.; Lei, A., *Organic Chemistry Frontiers* **2018**, 5 (12), 1957-1961.

4. Lv, B.; Gao, P.; Zhang, S.; Jia, X.; Wang, M.; Yuan, Y., Iron(iii)-catalyzed direct C–H radical amination of (hetero)arenes. *Organic Chemistry Frontiers* **2021**, 8 (19), 5440-5445.
5. Guo, R.; Adak, S.; Bellotti, P.; Gao, X.; Smith, W. W.; Le, S. N.; Ma, J.; Houk, K. N.; Glorius, F.; Chen, S.; Brown, M. K., *Journal of the American Chemical Society* **2022**, 144 (38), 17680-17691.
6. Nagarajan, S.; Majumder, S.; Sharma, U.; Rajendran, S.; Kumar, N.; Chatterjee, S.; Singh, B., *Bioorganic & Medicinal Chemistry Letters* **2013**, 23 (1), 287-290.
7. Yuan, Y.-C.; Bruneau, C.; Dorcet, V.; Roisnel, T.; Gramage-Doria, R., *The Journal of Organic Chemistry* **2019**, 84 (4), 1898-1907.
8. Sankhe, S. S.; Chindarkar, N. R., Synthesis, *Journal of the Indian Chemical Society* **2021**, 98 (3), 100027.
9. Khedkar, M. V.; Khan, S. R.; Sawant, D. N.; Bagal, D. B.; Bhanage, B. M., *Advanced Synthesis & Catalysis* , **2011**, 353 (18), 3415-3422.
10. Khedkar, M. V.; Khan, S. R.; Sawant, D. N.; Bagal, D. B.; Bhanage, B. M., *Advanced Synthesis & Catalysis* , **2011**, 353 (18), 3415-3422.
11. Wen, X.; Liu, X.; Yang, Z.; Xie, M.; Liu, Y.; Long, L.; Chen, Z., *Organic & Biomolecular Chemistry* **2021**, 19 (8), 1738-1743.
12. Kumar, P. P.; Rama Devi, B.; Dubey, P. K.; Mohiuddin, S. M. G., *PGreen Chemistry Letters and Reviews* **2011**, 4 (4), 341-348.
13. Davood, A.; Azimidoost, L.; Shafaroodi, H.; Amini, M.; Iman, M.; Ansari, A.; Nikbakht, A.; Rahmatpour, S.; Nematollahi, A. R., *Pharmaceutical Chemistry Journal* **2014**, 48 (3), 175-180.
14. Capitosti, S. M.; Hansen, T. P.; Brown, M. L., *Bioorganic & Medicinal Chemistry* **2004**, 12 (2), 327-336.
15. Nakayama, H.; Nishida, J.-i.; Takada, N.; Sato, H.; Yamashita, Y., *Chemistry of Materials* **2012**, 24 (4), 671-676.
16. Wang, X.; Xiong, W.; Huang, Y.; Zhu, J.; Hu, Q.; Wu, W.; Jiang, H., *Organic Letters* **2017**, 19 (21), 5818-5821.
17. Xie, Y.-T.; Hou, R.-S.; Wang, H.-M.; Kang, I.-J.; Chen, L.-C., *Journal of the Chinese Chemical Society* **2009**, 56 (4), 839-842.
18. Wójcik, P.; Trzeciak, A. M., *Applied Catalysis A: General* **2018**, 560, 73-83.
19. Mashooq a BHAT and Mohammed A AL-OMAR, *Acta Poloniae Pharmaceutica* **2011**, 68 (3) 375-380
20. Karunakar, P.; Kumar, C. N. S. S. P., *Russian Journal of Organic Chemistry* **2020**, 56 (7), 1289-1294.

## 5. NMR Spectroscopic Data for Products

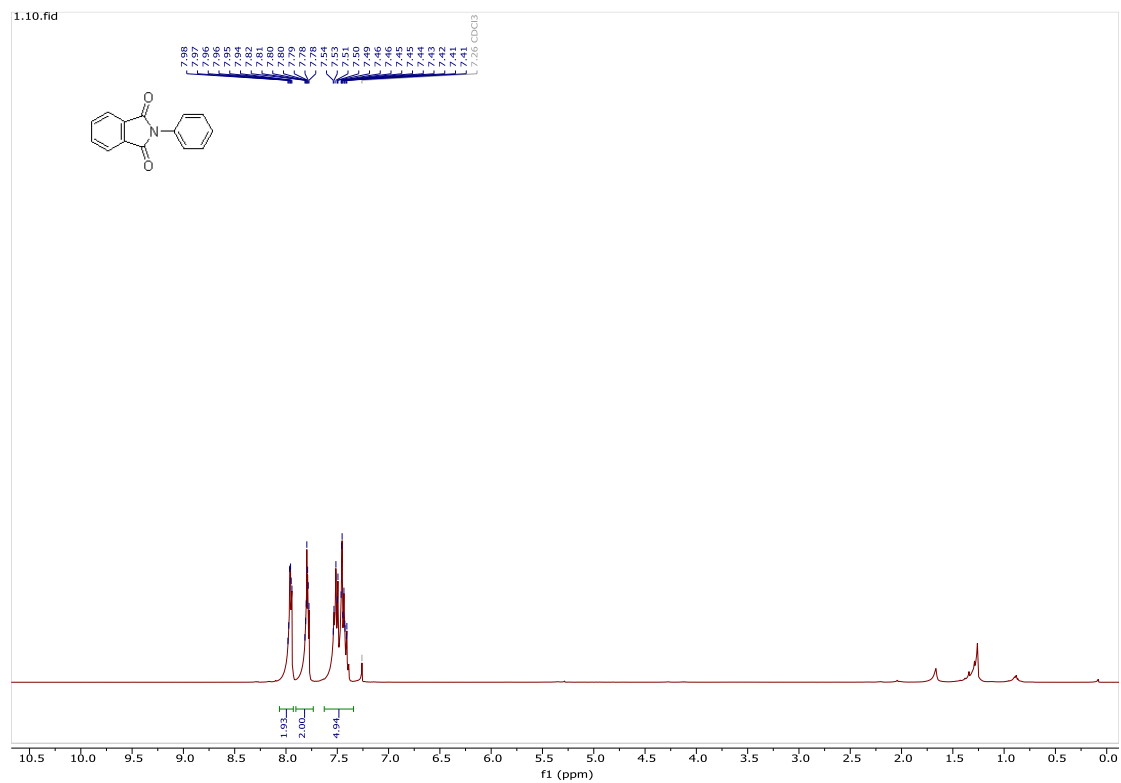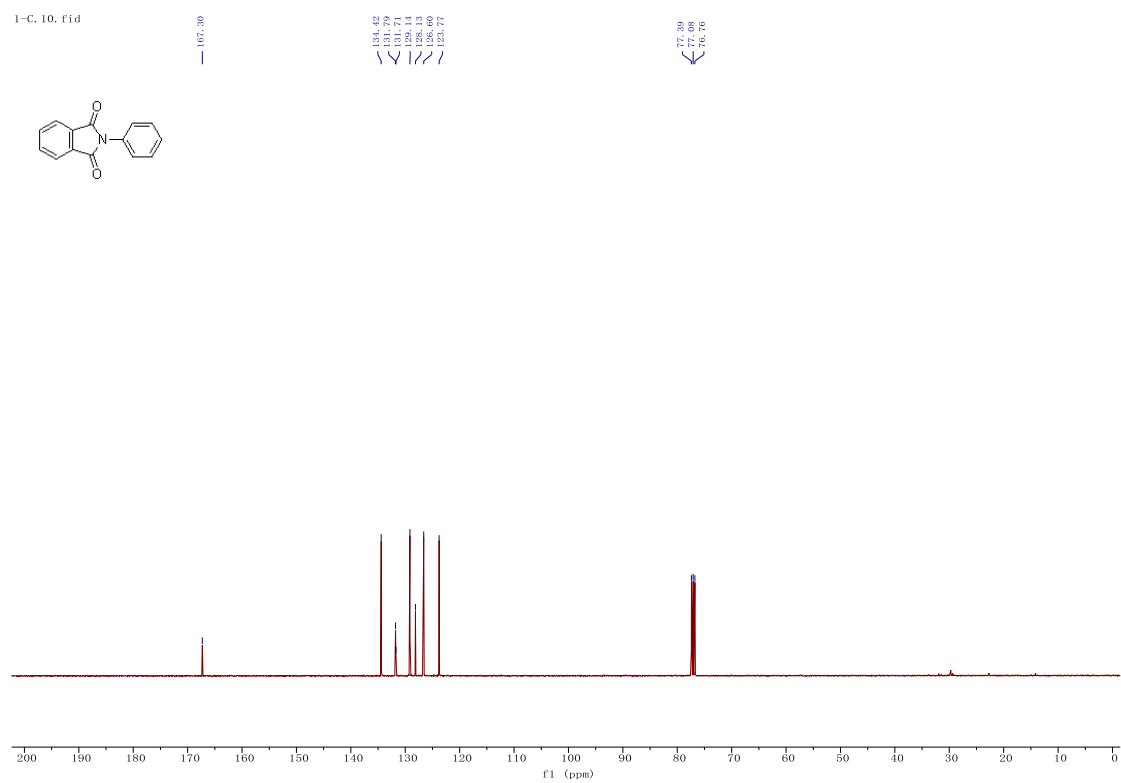

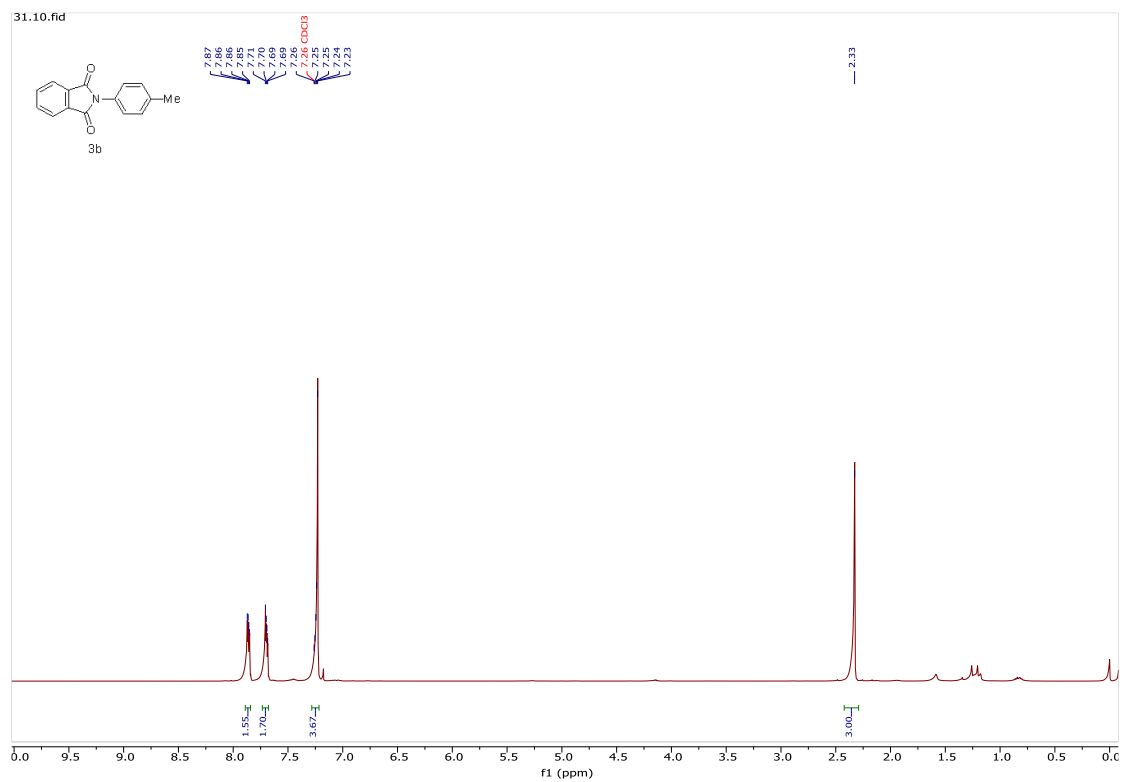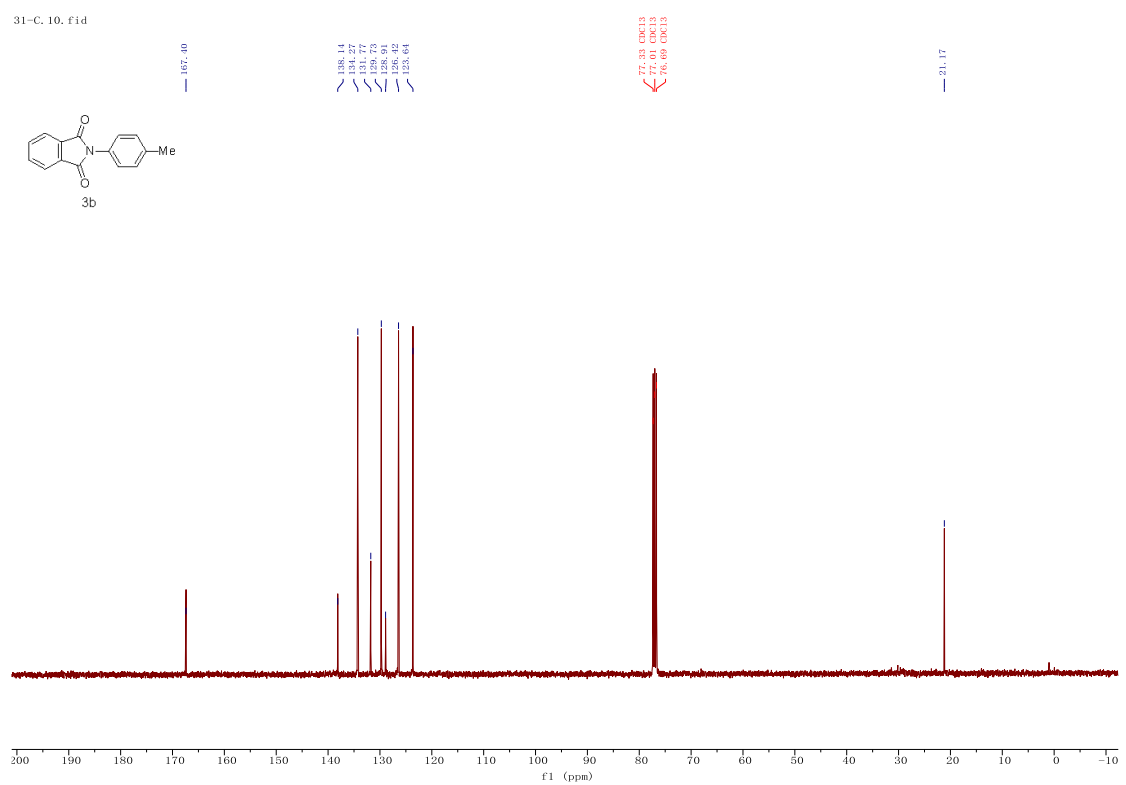

35.10.fid

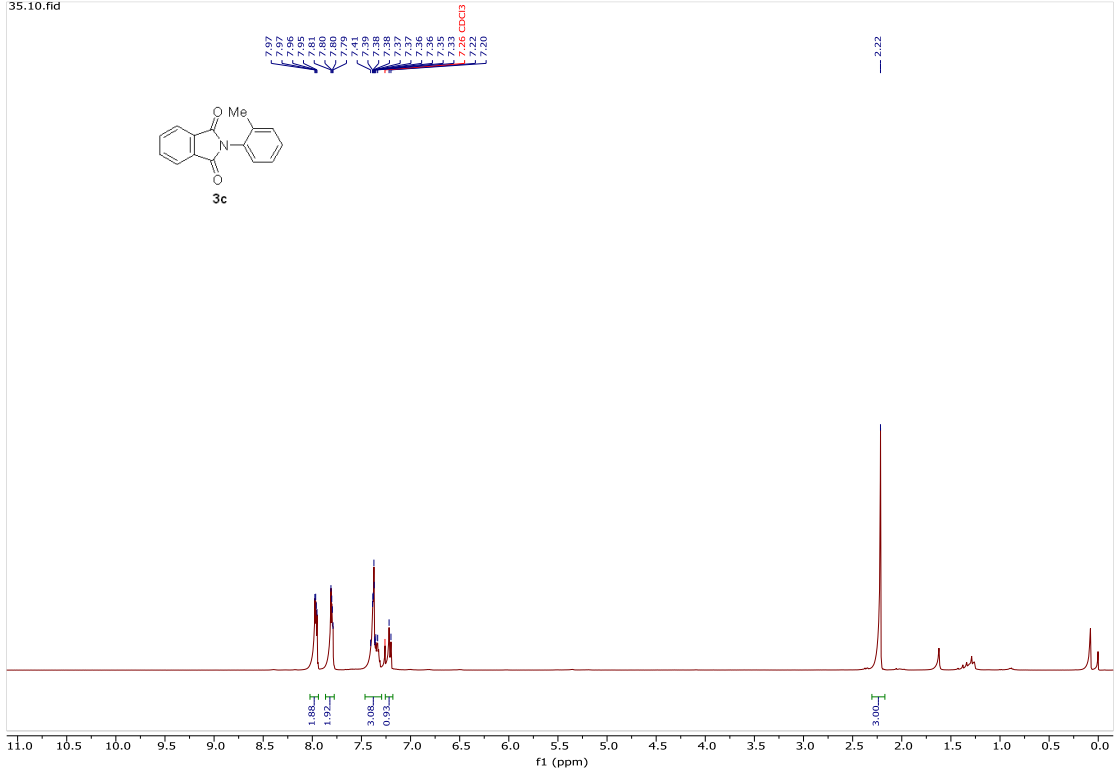

35-C, 10, fid

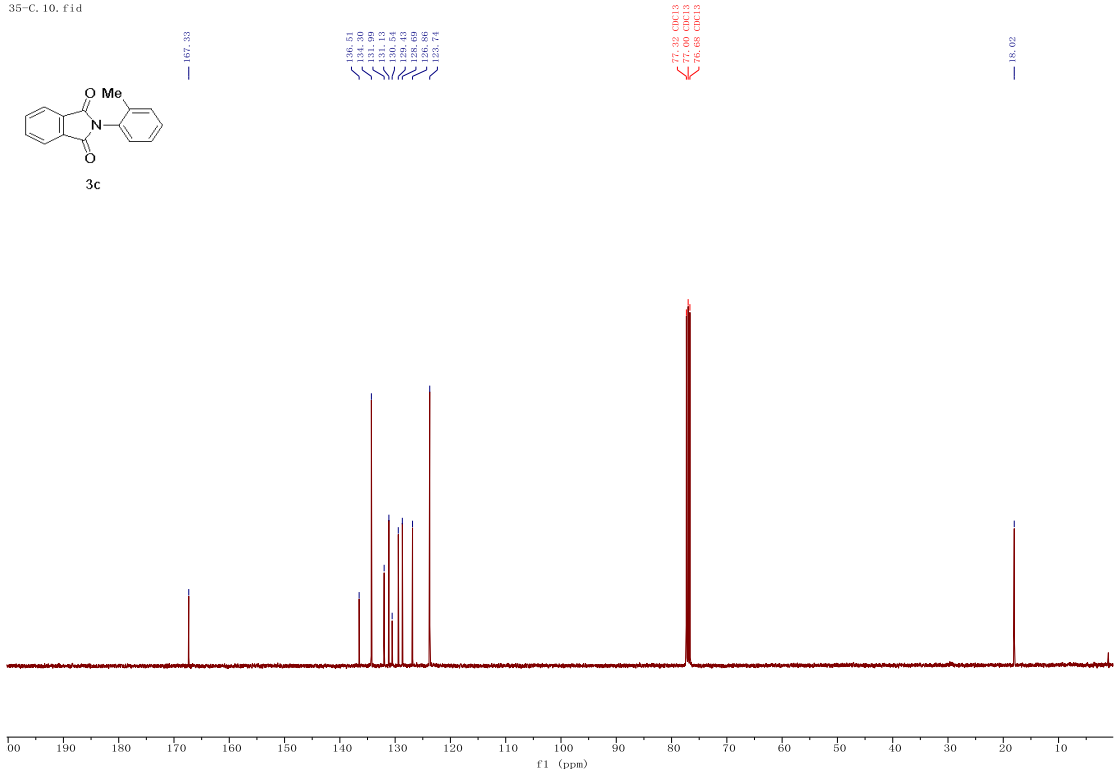



2023-6-12\_143.fid  
20230612-3-H

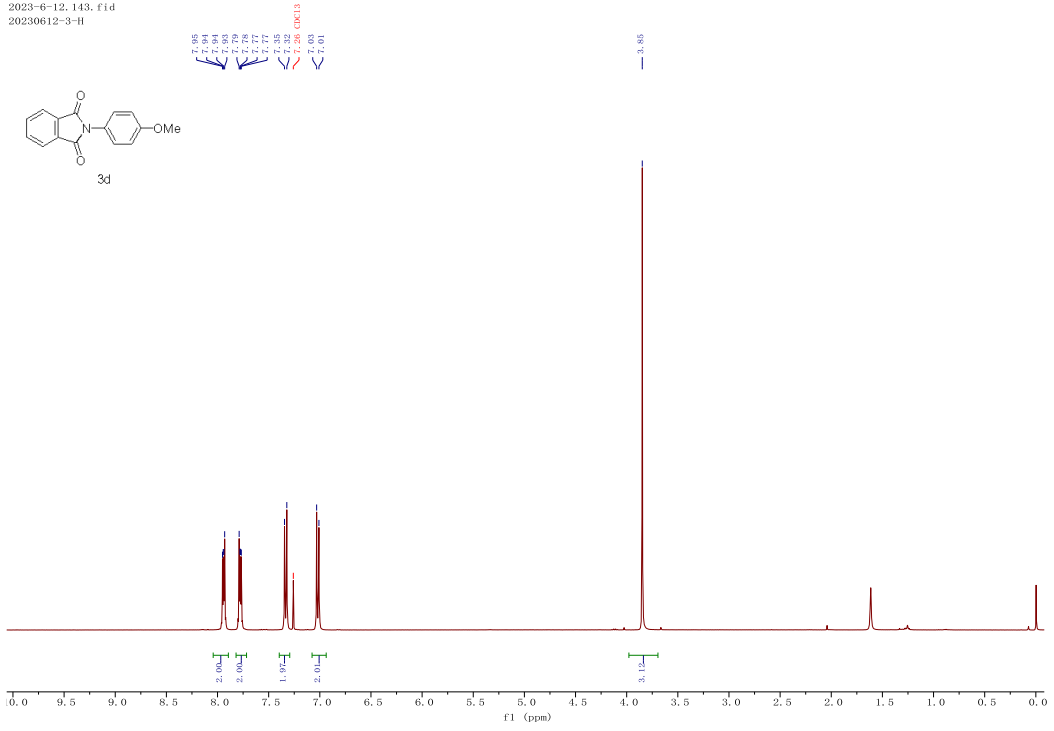

4\_10.fid

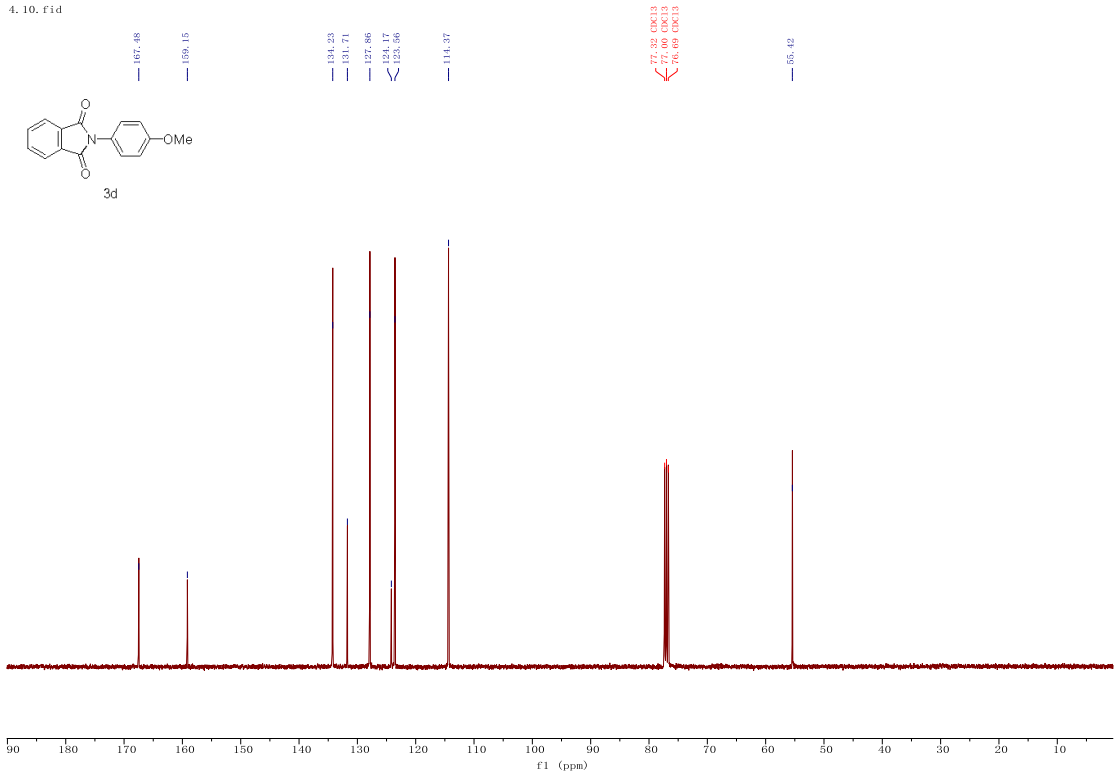



2023-4-17\_114.fid  
20230417-3-H

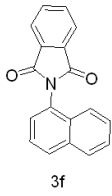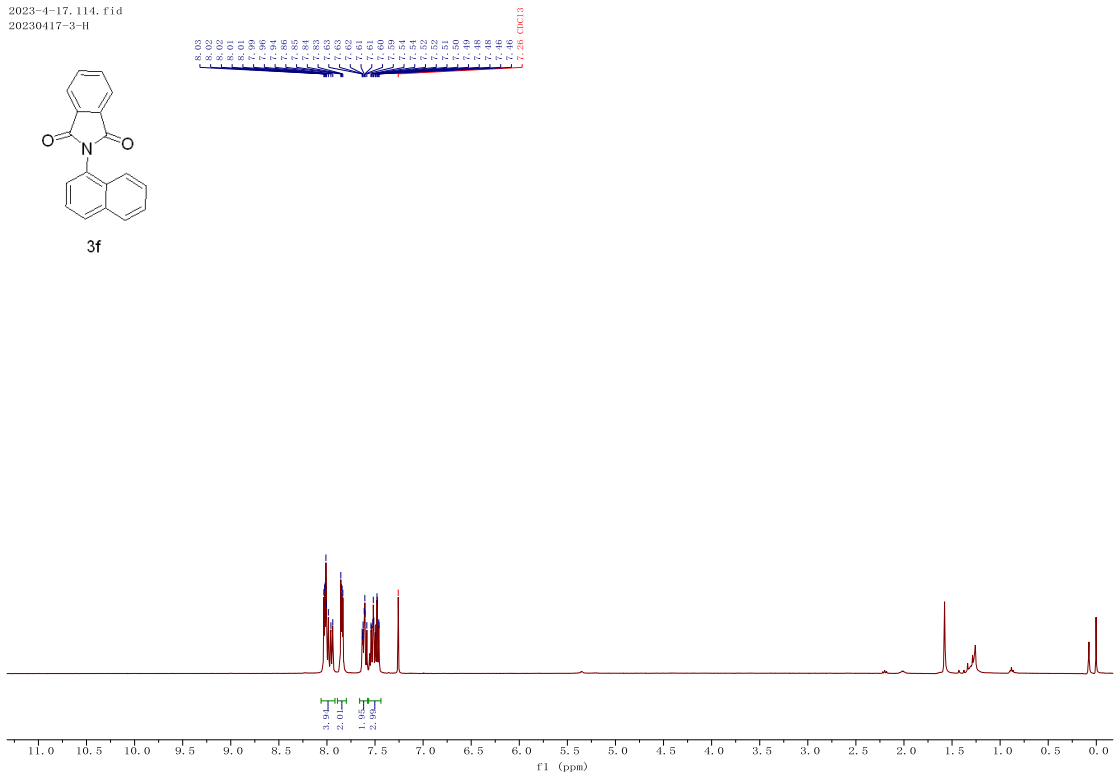

YZP-1.10.fid

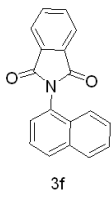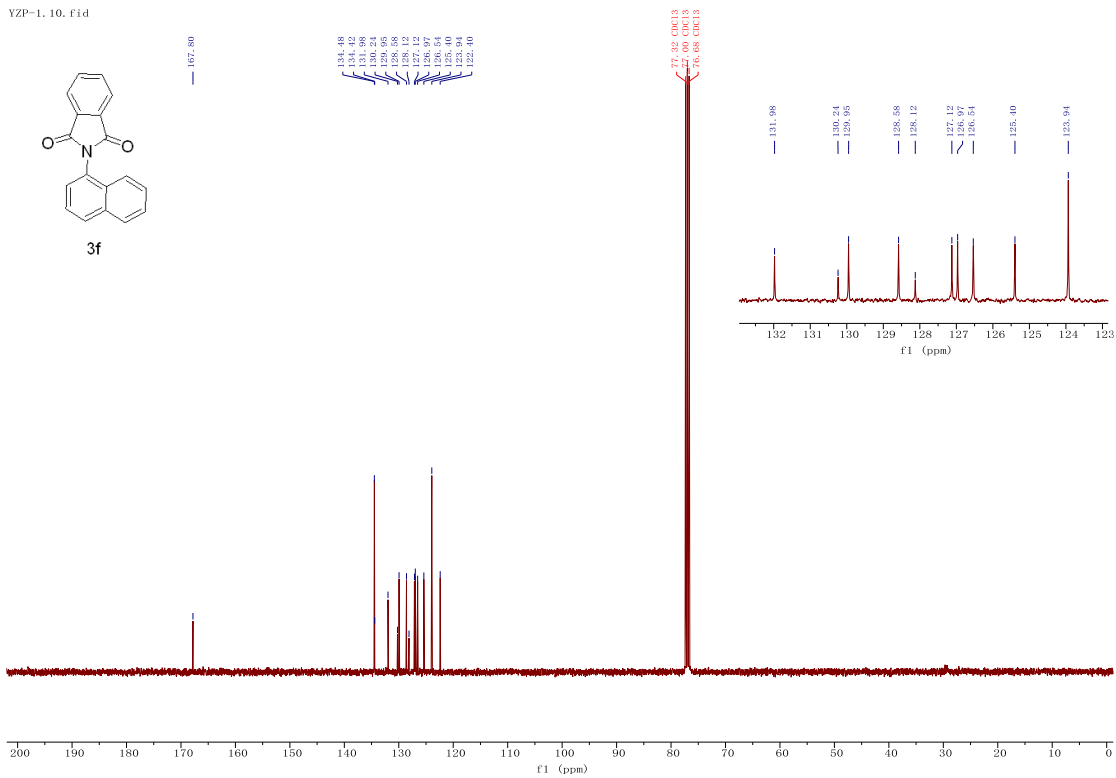

2023-6-12, 142, fid  
20230612-2-H

7.97  
7.96  
7.95  
7.81  
7.80  
7.79  
7.47  
7.47  
7.42  
7.42  
7.40

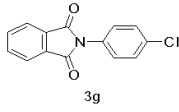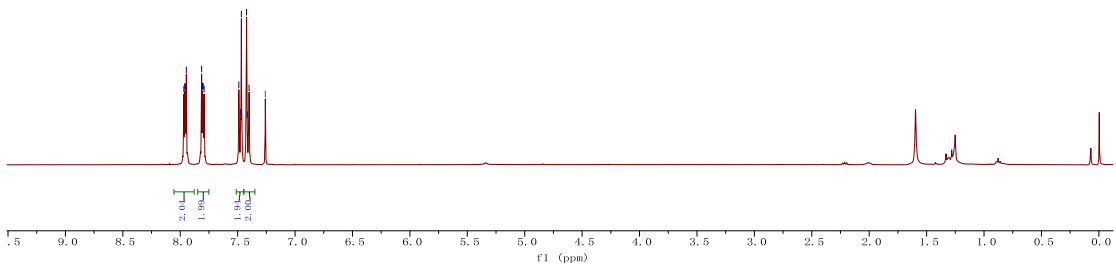

6.10, fid

166.92

134.51  
133.72  
130.35  
129.24  
123.79

77.76 C10013  
76.99 C1013

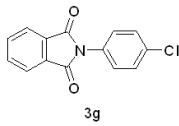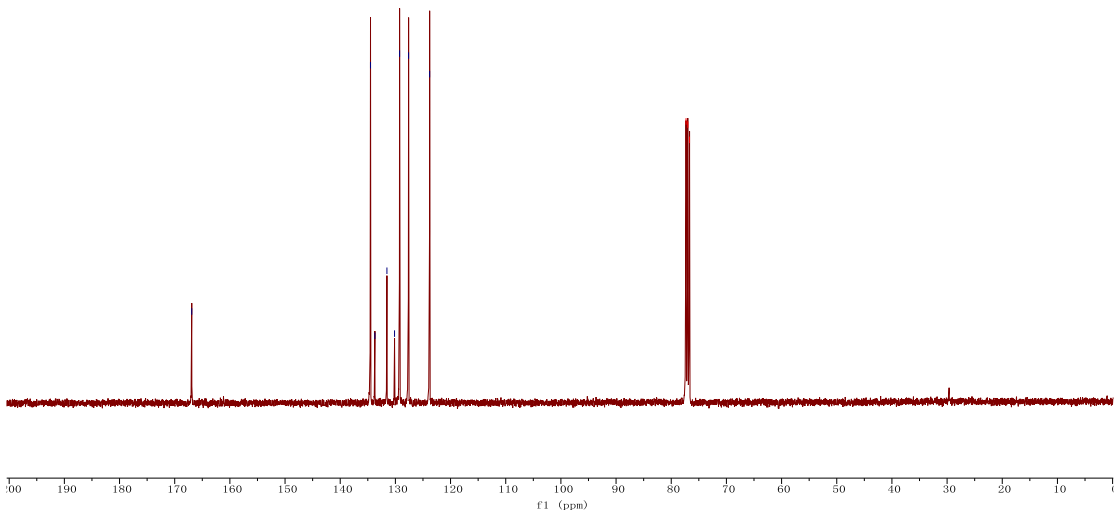

2023-3-11\_91.fid  
20230310-1-H

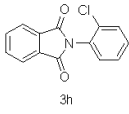

7.99  
7.97  
7.96  
7.87  
7.81  
7.59  
7.58  
7.57  
7.51  
7.44  
7.43  
7.42  
7.42  
7.37  
7.36  
7.35  
7.35  
7.29 CDCl3

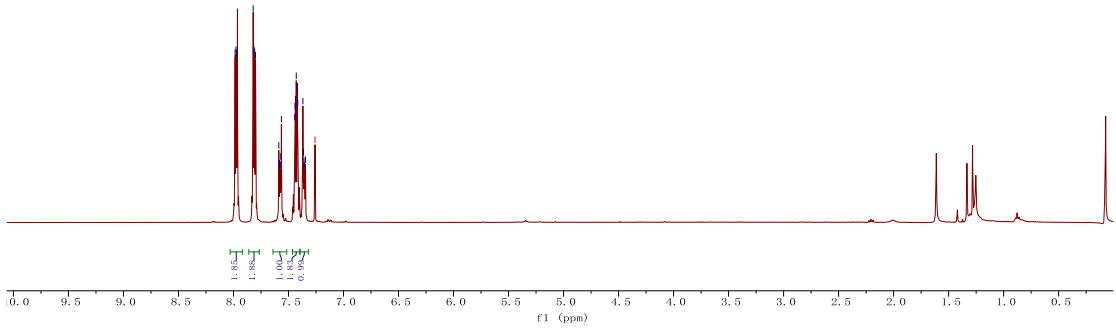

2023-3-11\_92.fid  
20230310-1-C

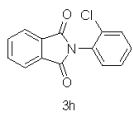

166.61  
134.46  
133.88  
130.64  
129.61  
127.70  
125.94  
77.82 CDCl3  
76.68 CDCl3

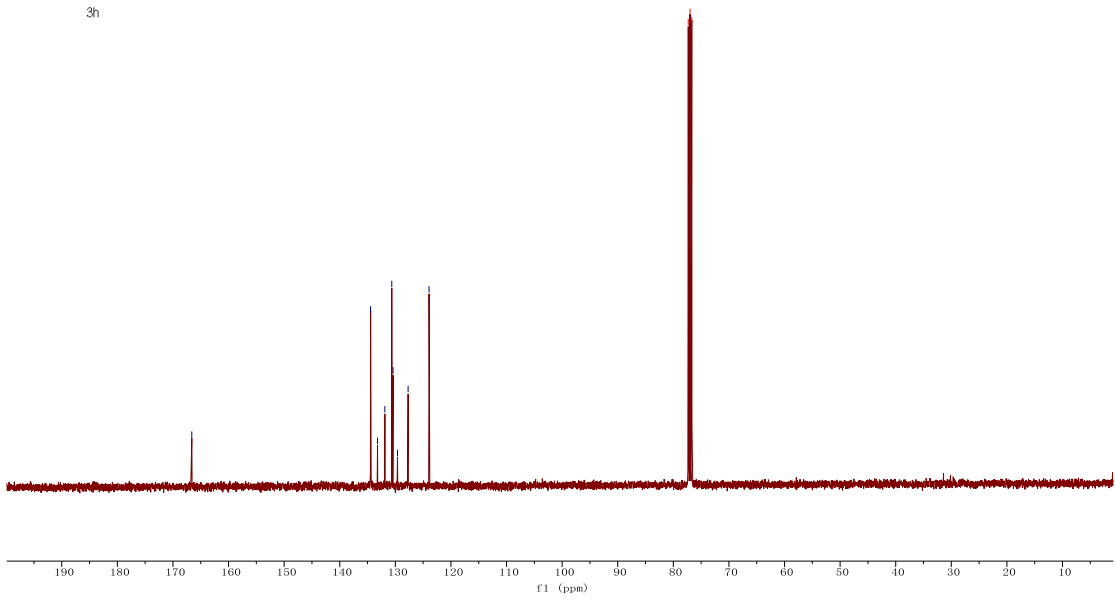

10-HL 10. f1d

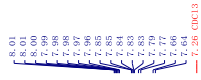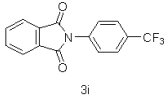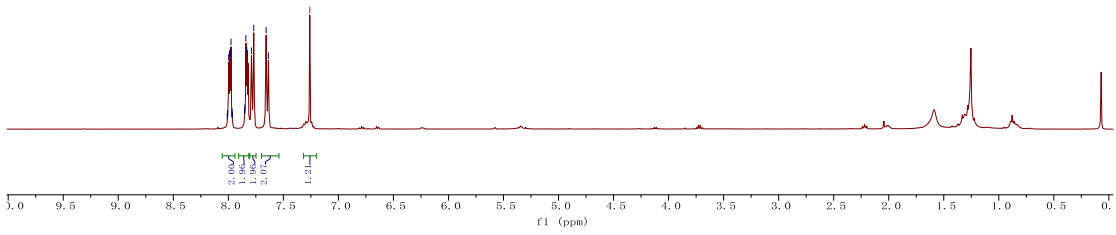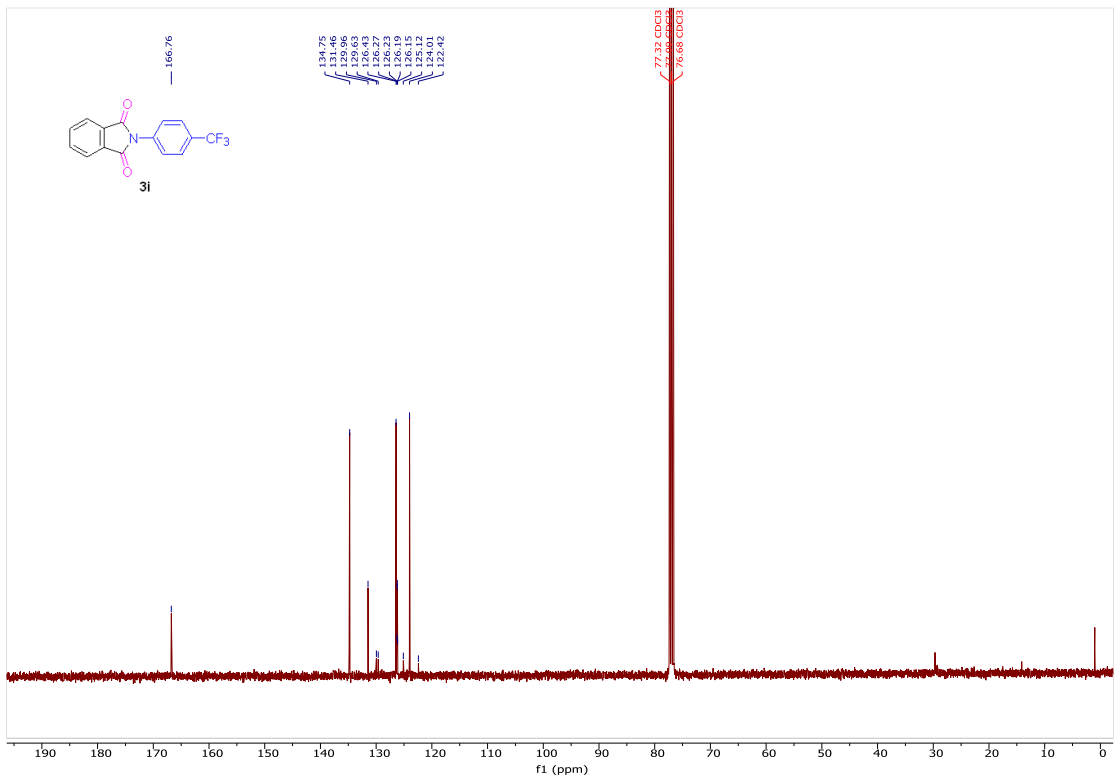

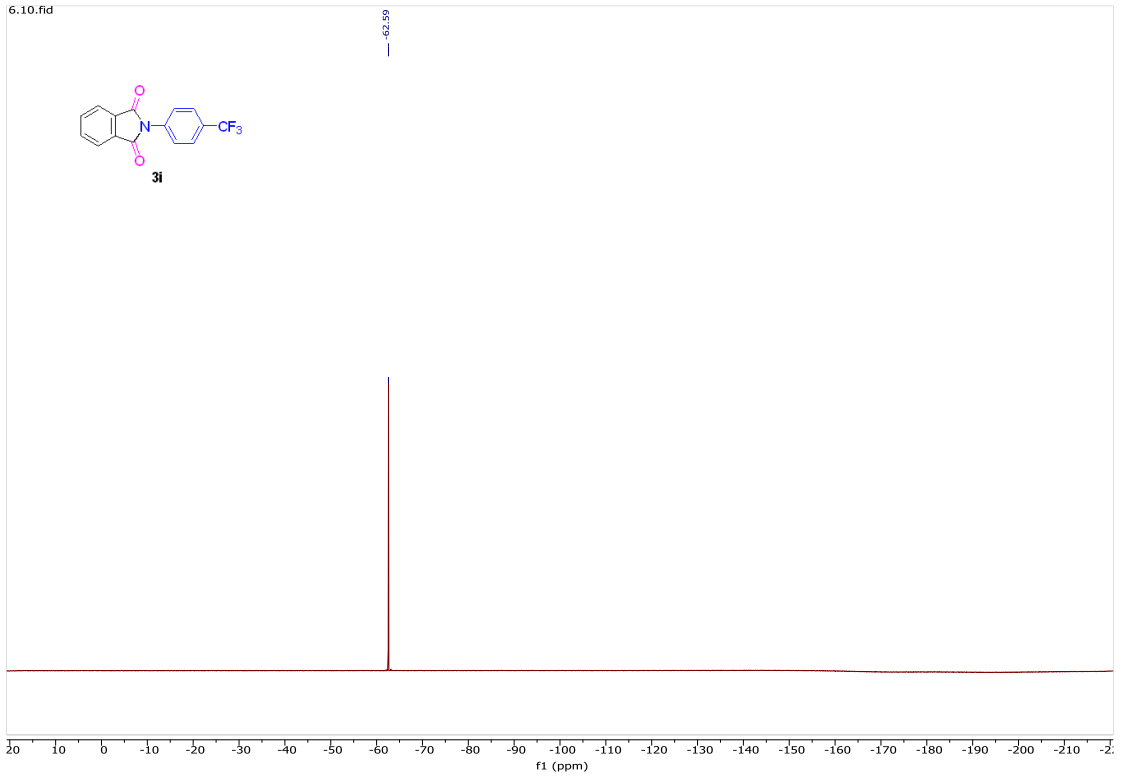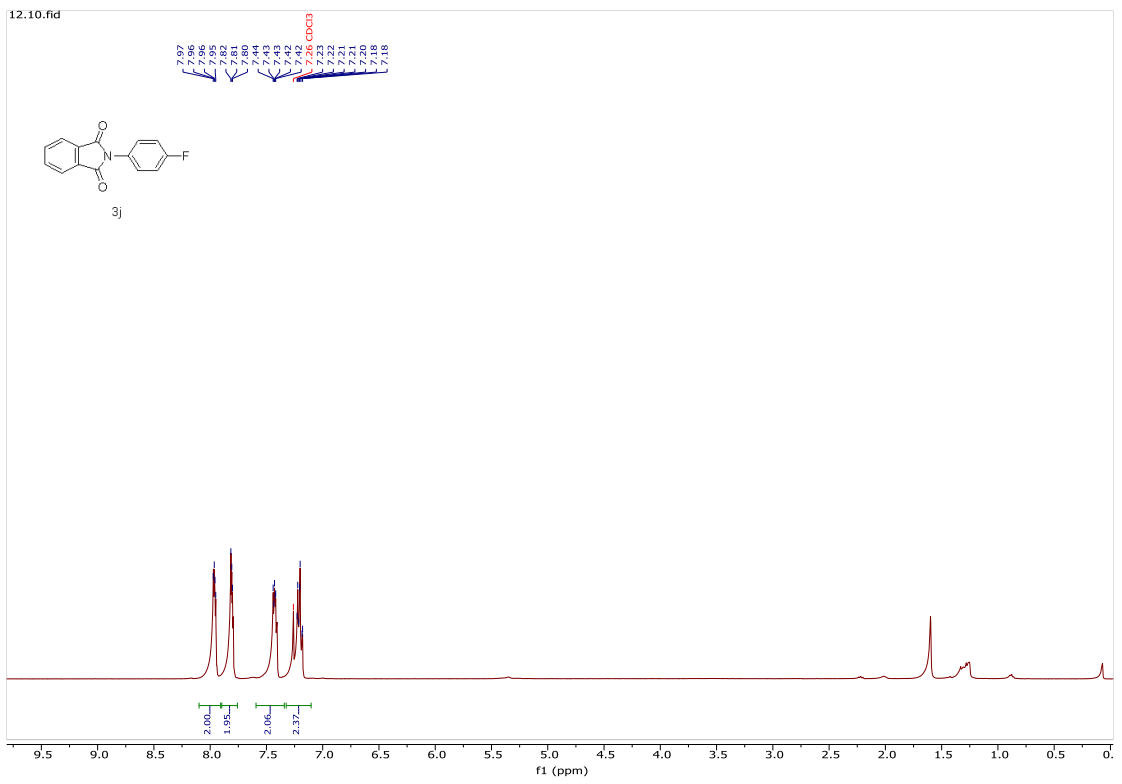

12-C. 11. fid

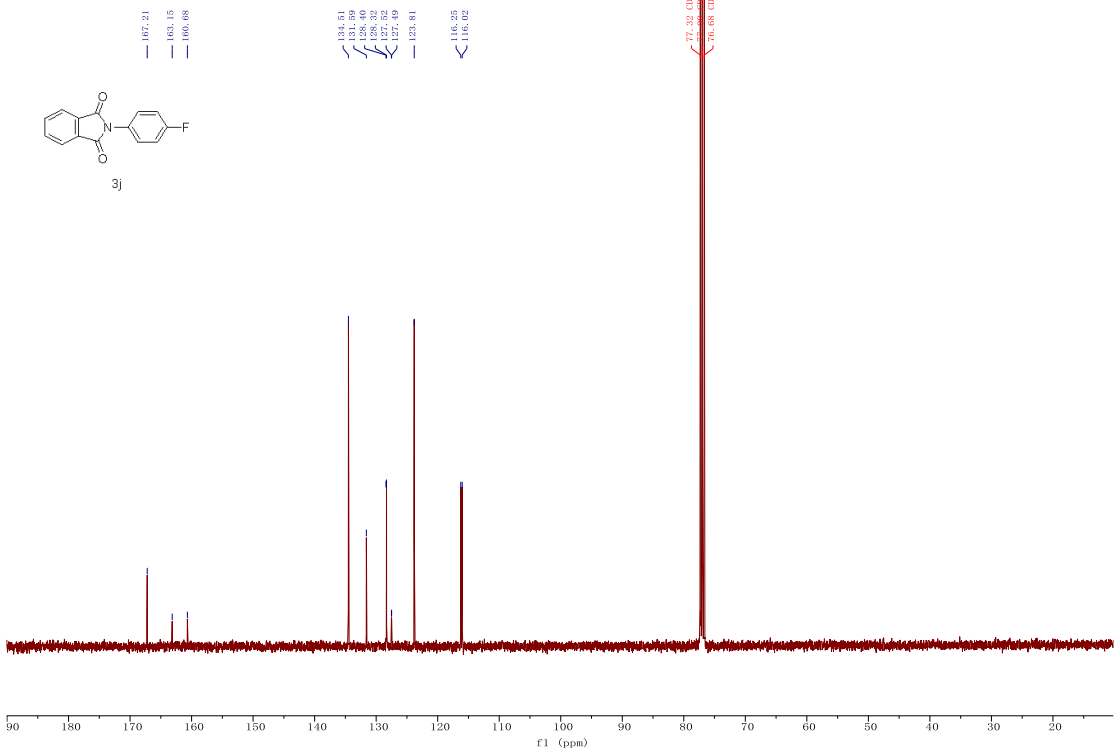

12-C. 10. fid

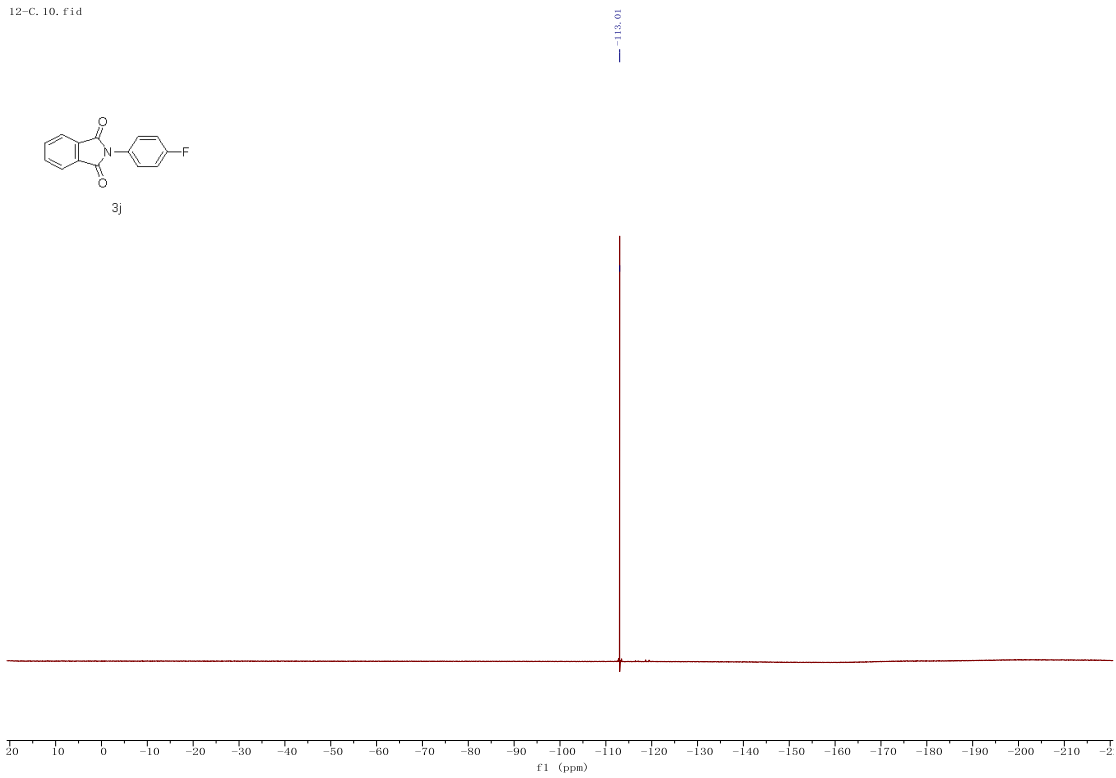



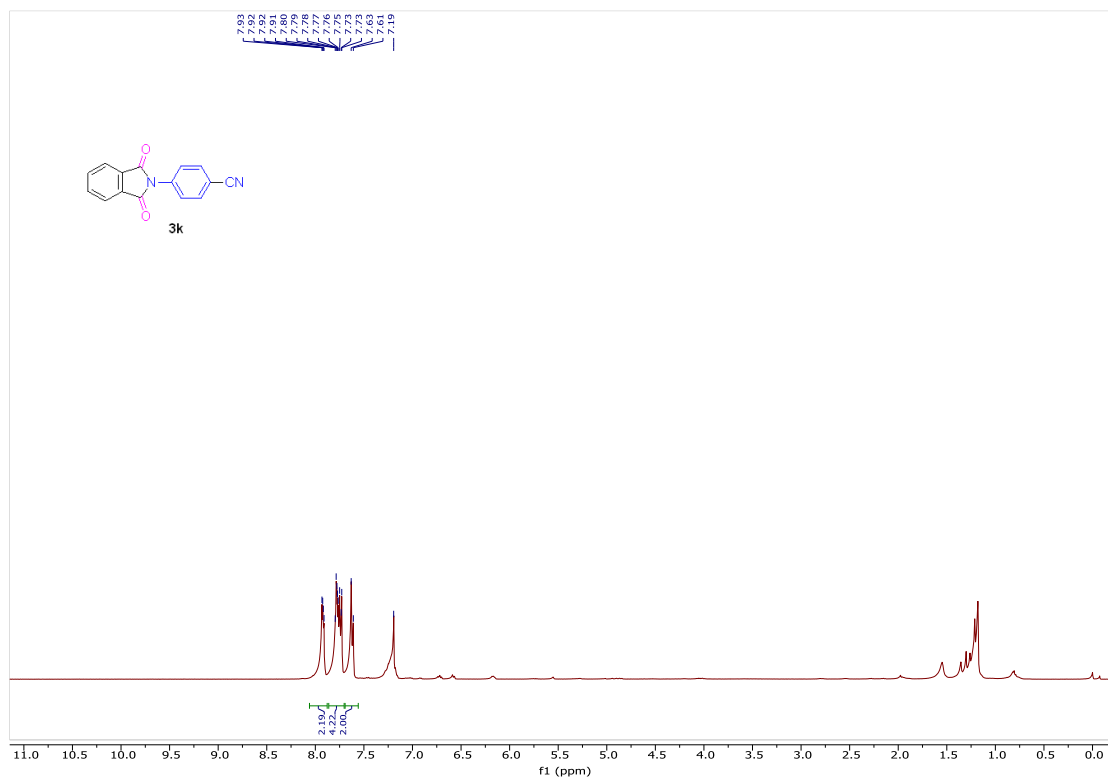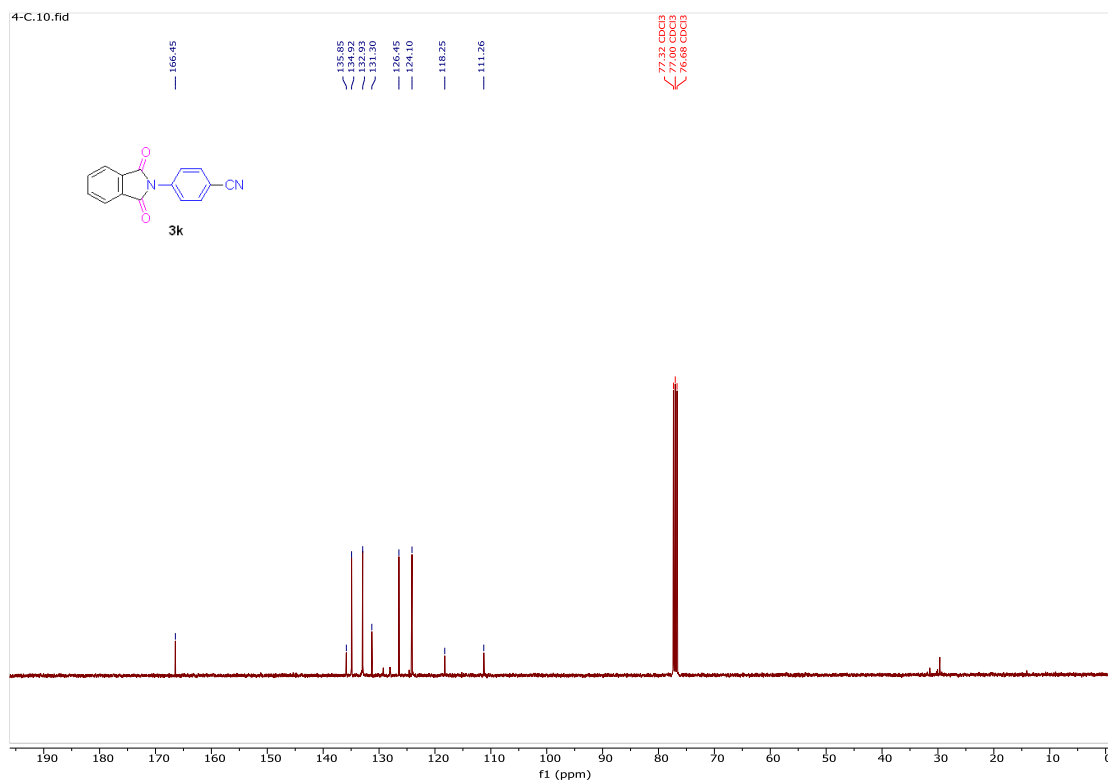

32.10.fid

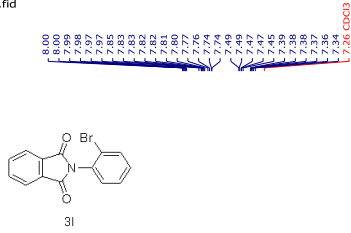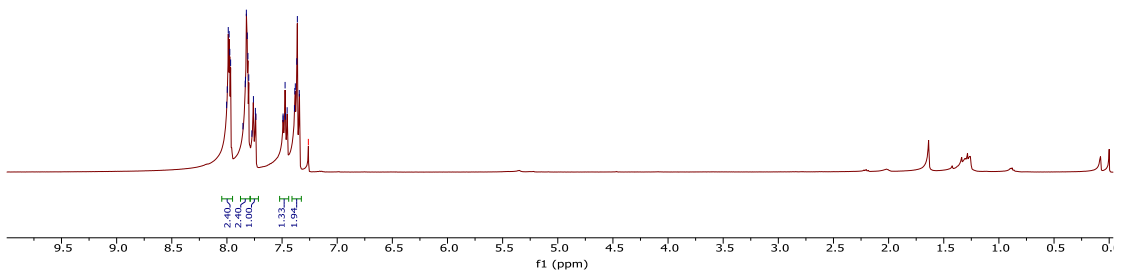

32-C. 10. fid

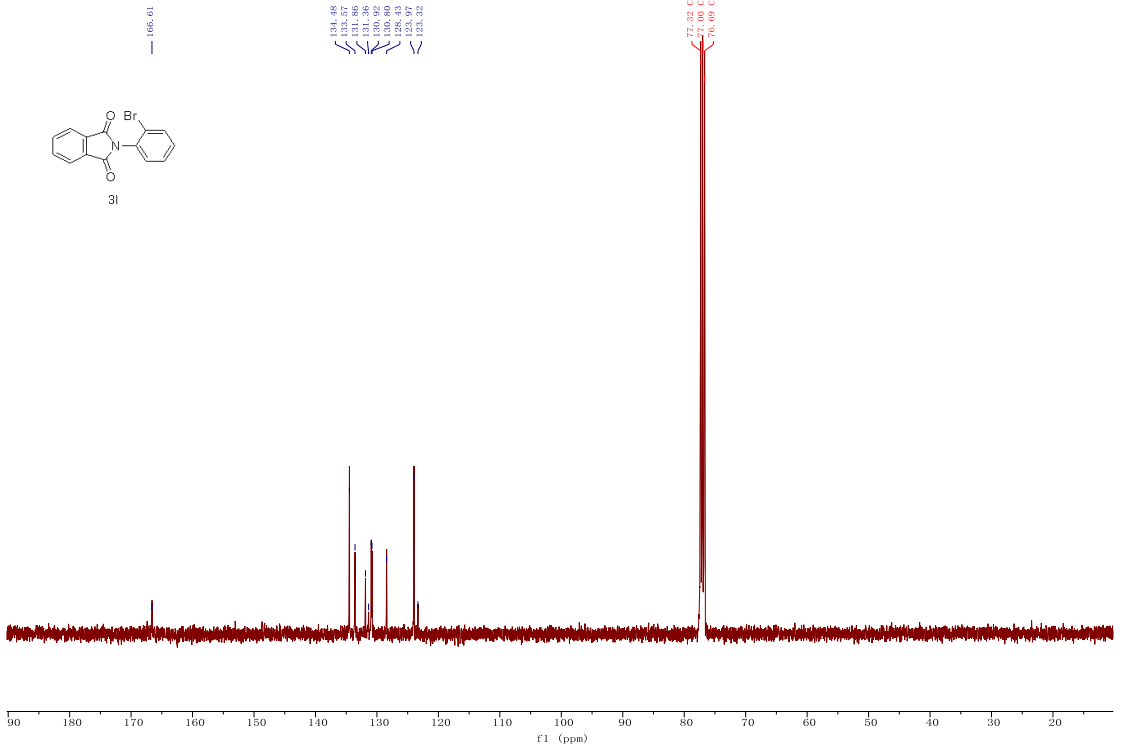

2023-5-31\_135.fid  
20230531-3-H

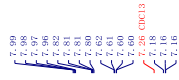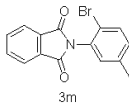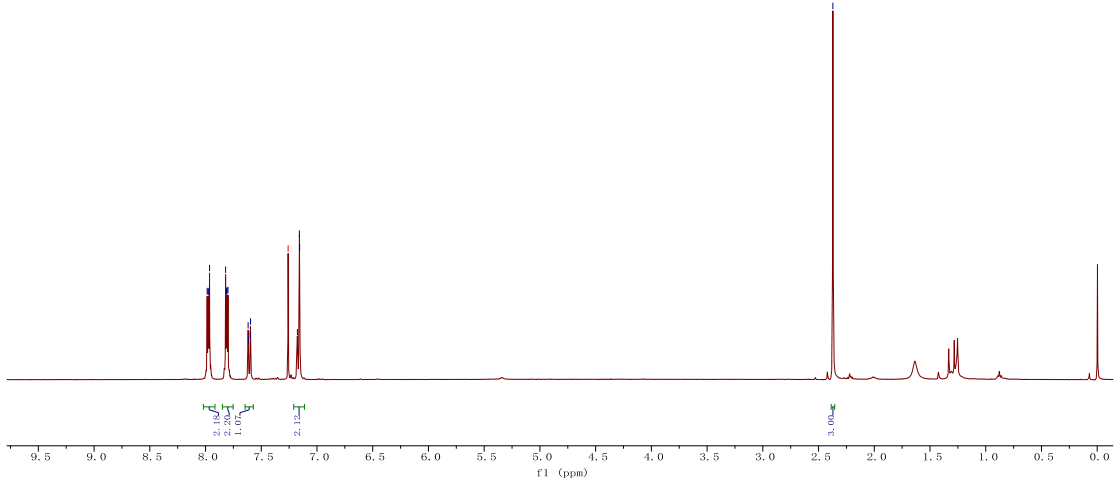

8\_10.fid

166.72

138.90  
138.94  
133.12  
131.86  
131.33  
130.96  
123.93  
119.74

77.32 CDCl3  
77.06 CDCl3  
76.68 CDCl3

20.83

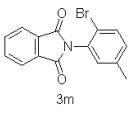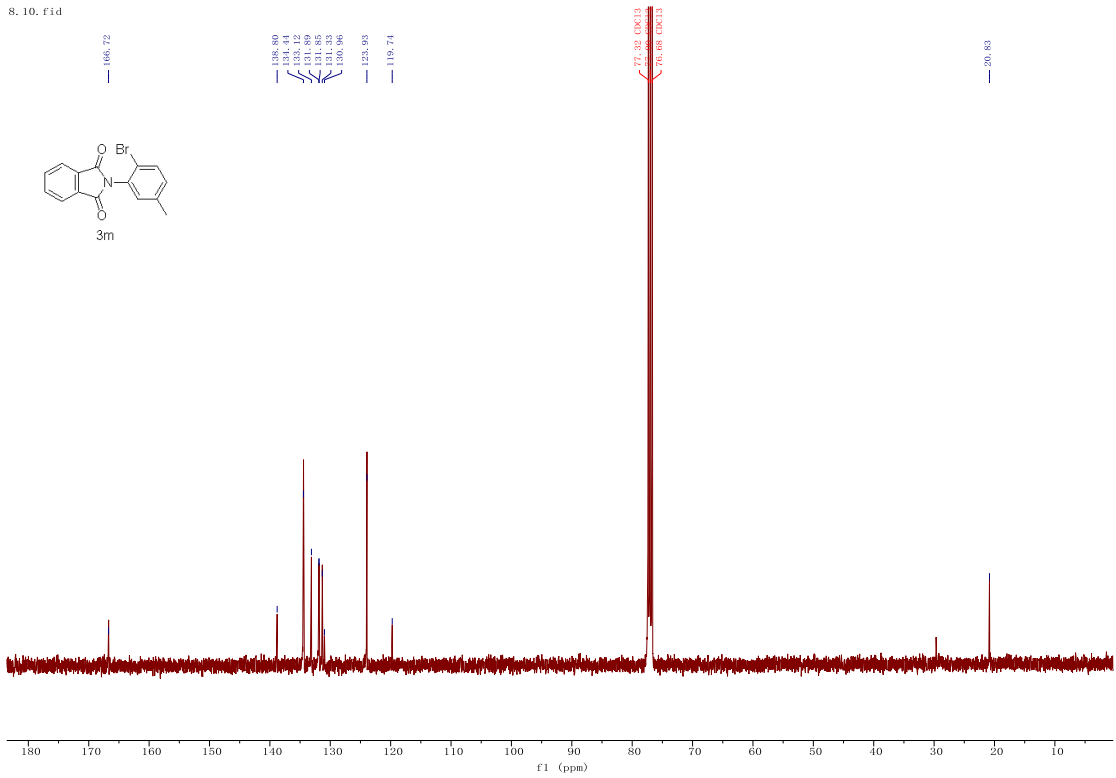



2023-6-26\_167.fid  
20230626-3-C

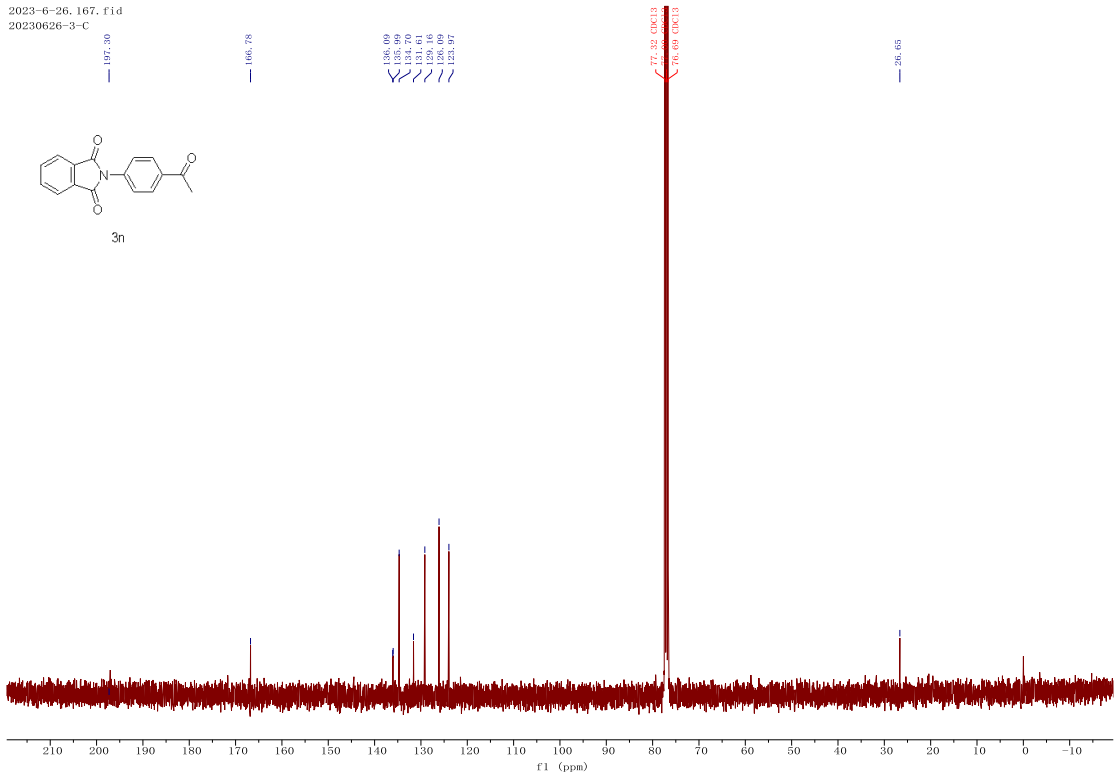

2023-5-31\_134.fid  
20230531-2-H

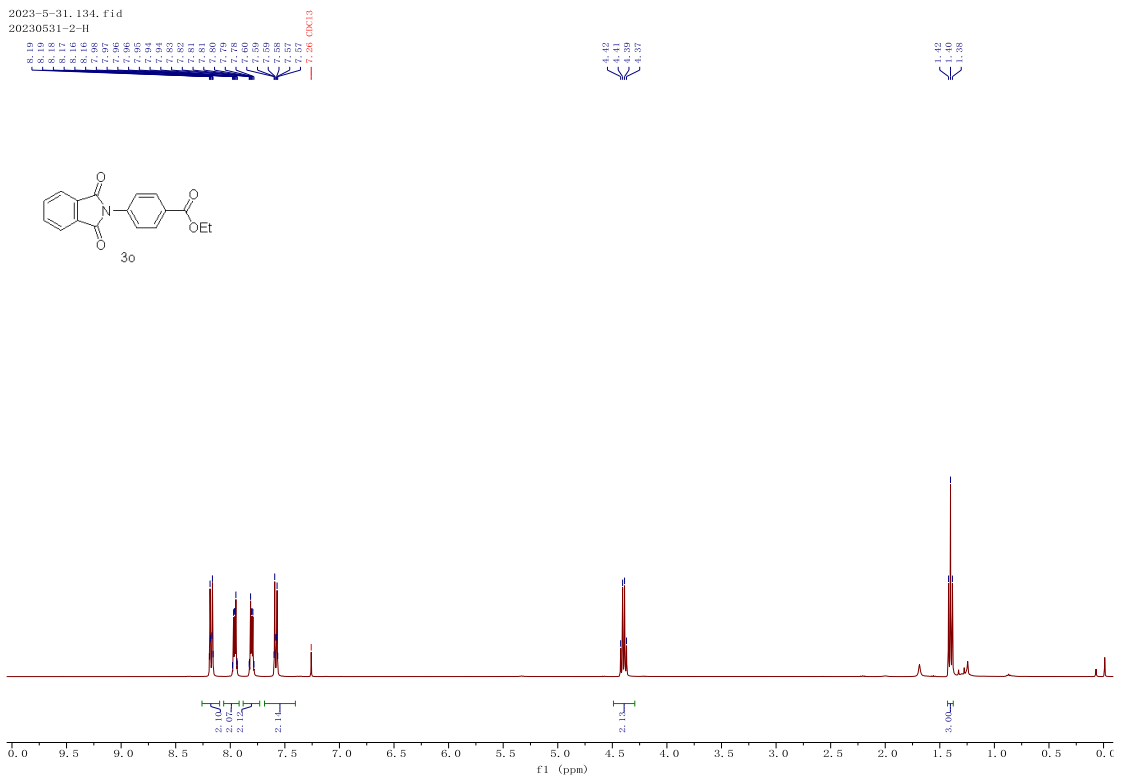

7.10. f1d

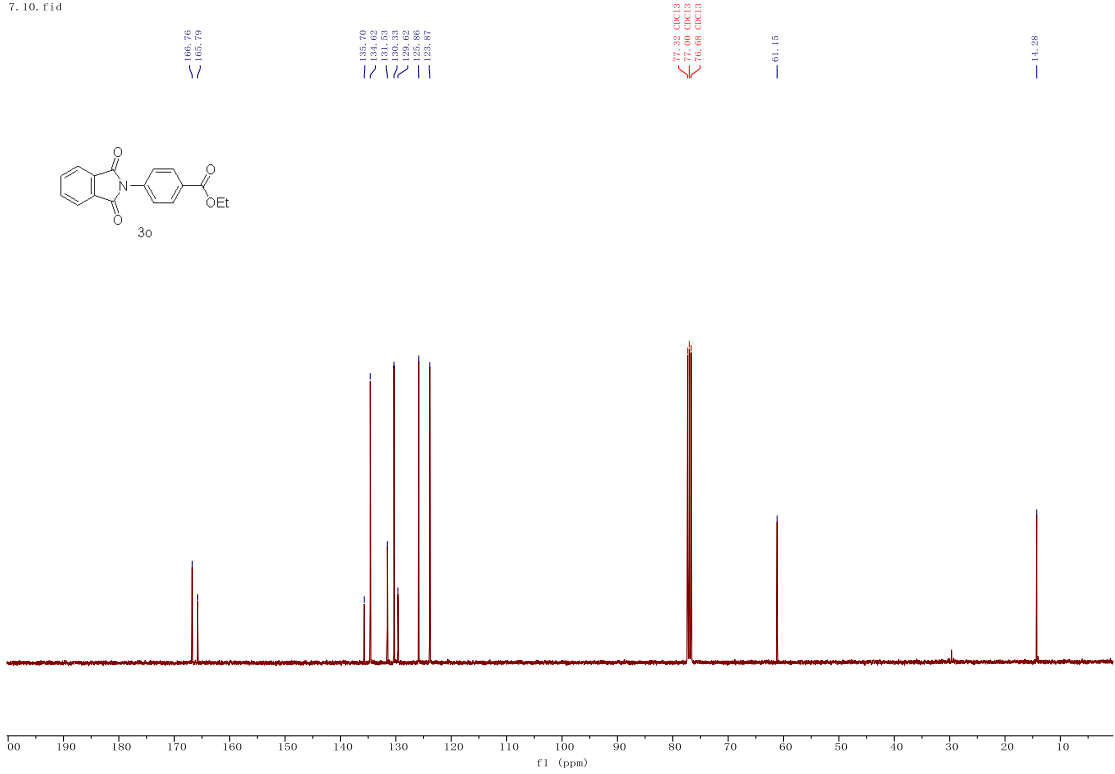

2023-7-21\_197.f1d  
20230721-1-H

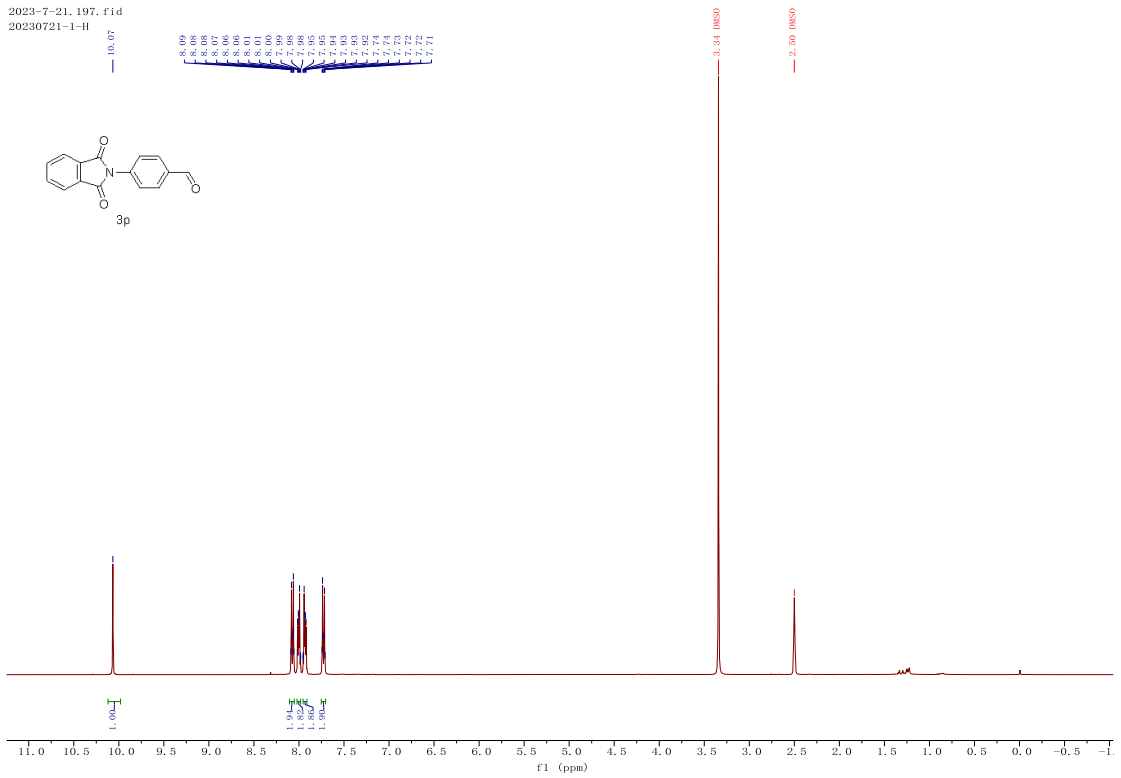

1.10.f1d

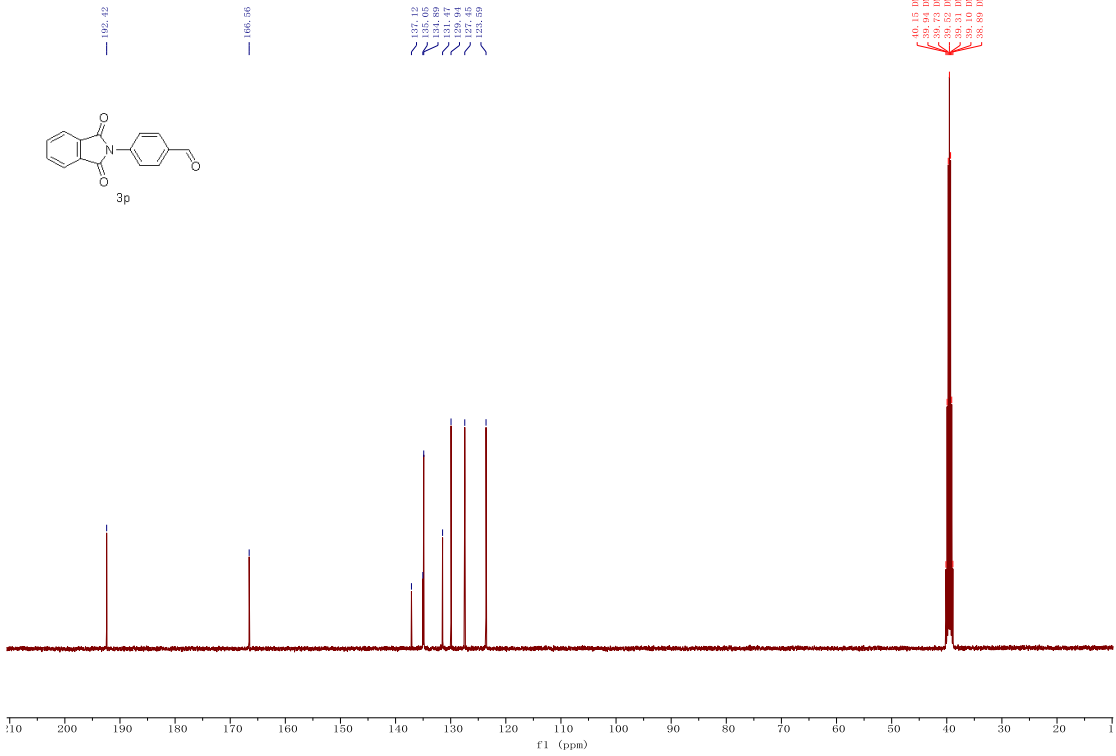

13.10.f1d

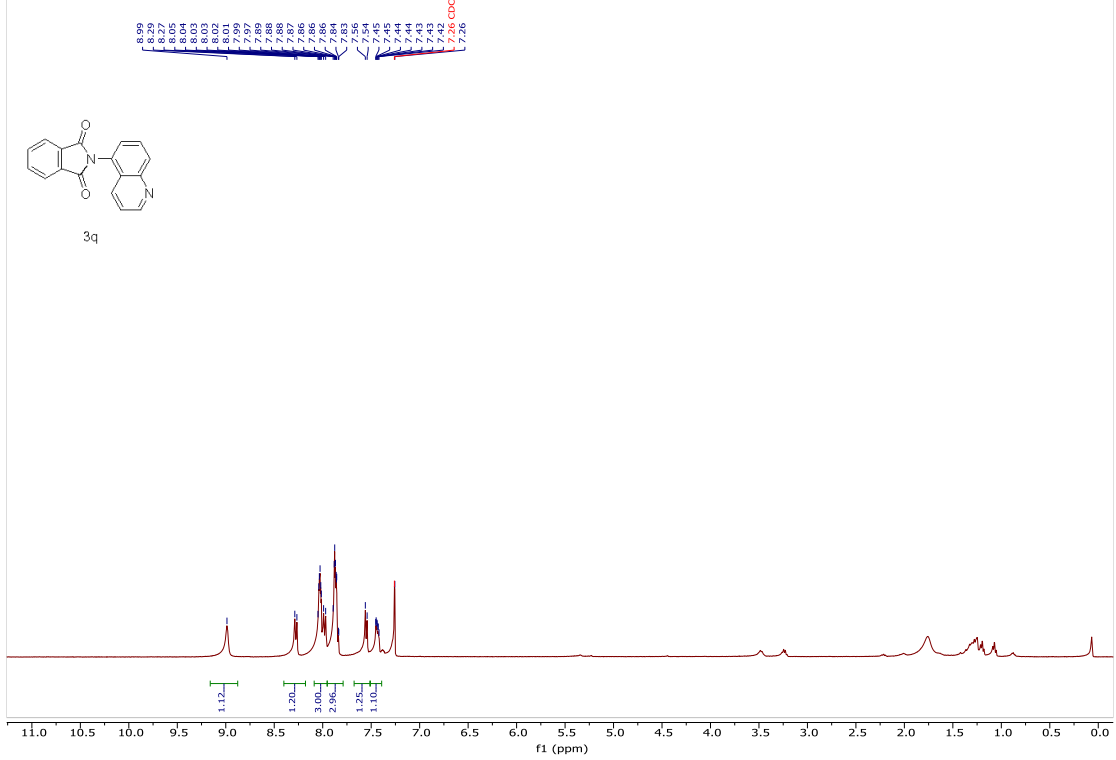

13-C-10.fid

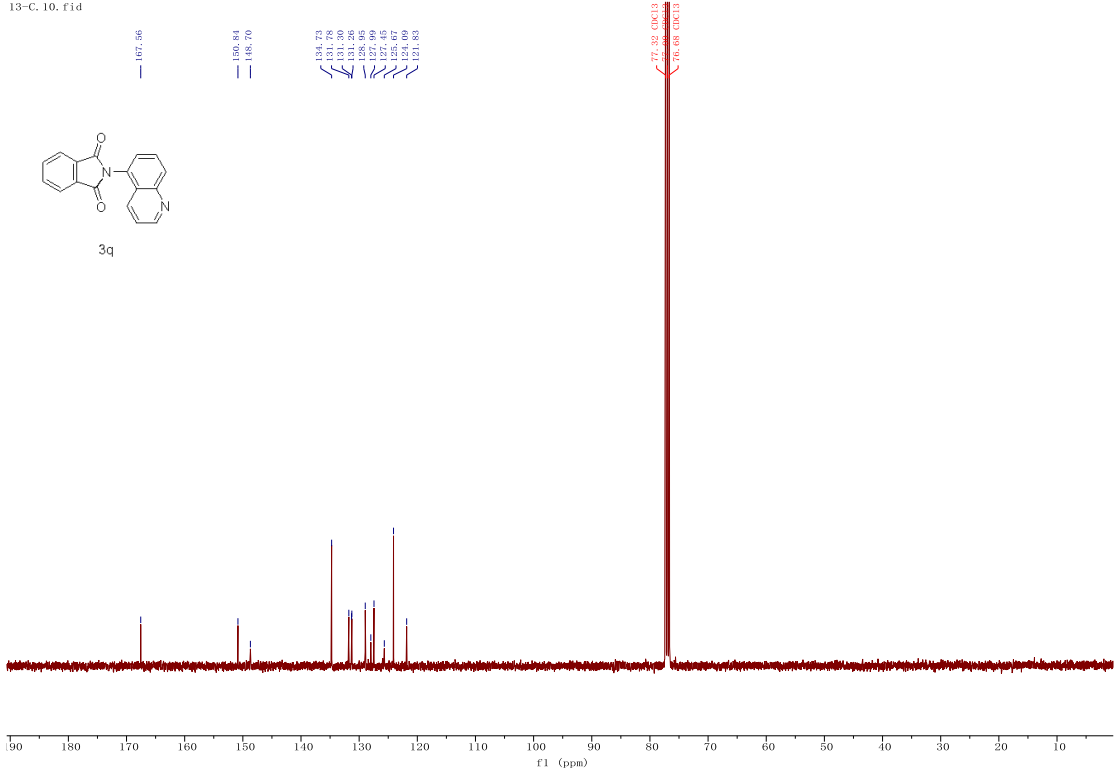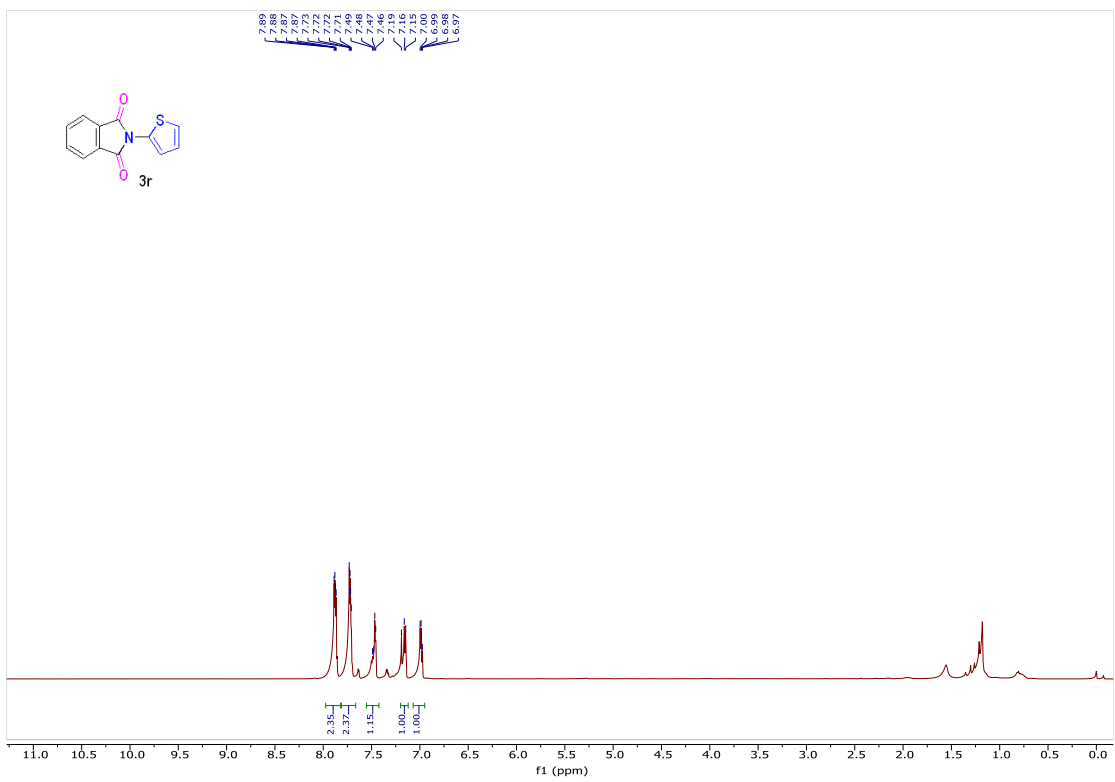



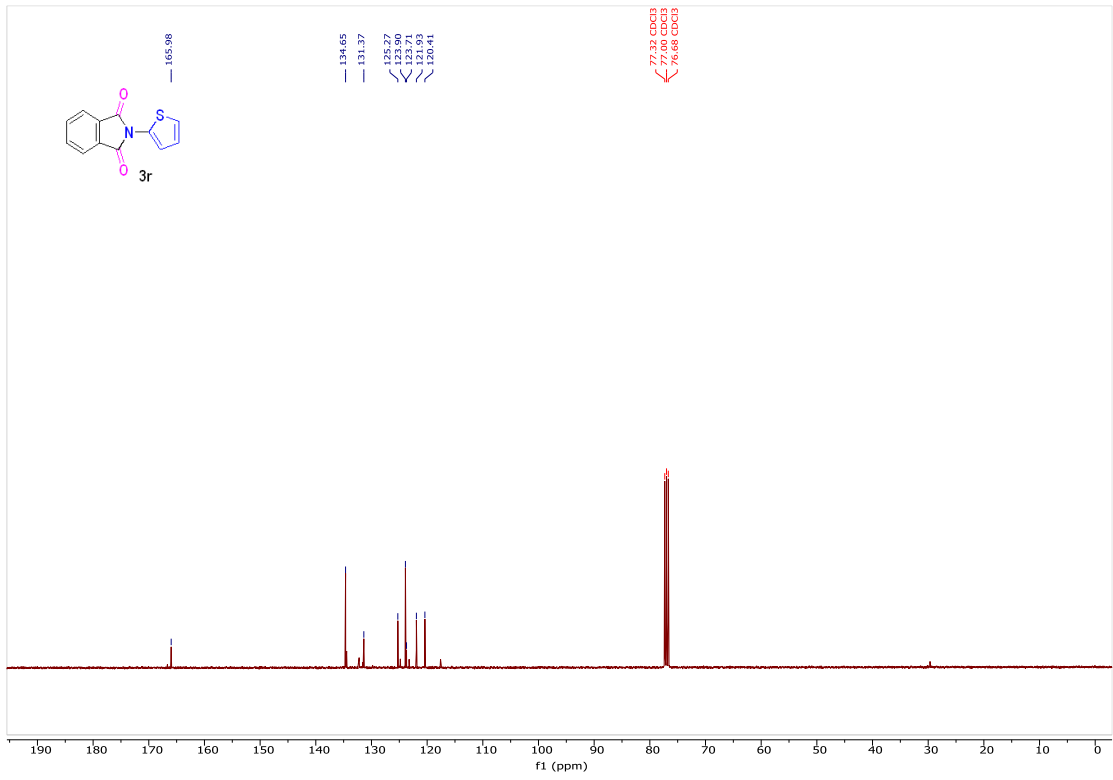

2023-6-12. 146. fid  
20230612-6-H

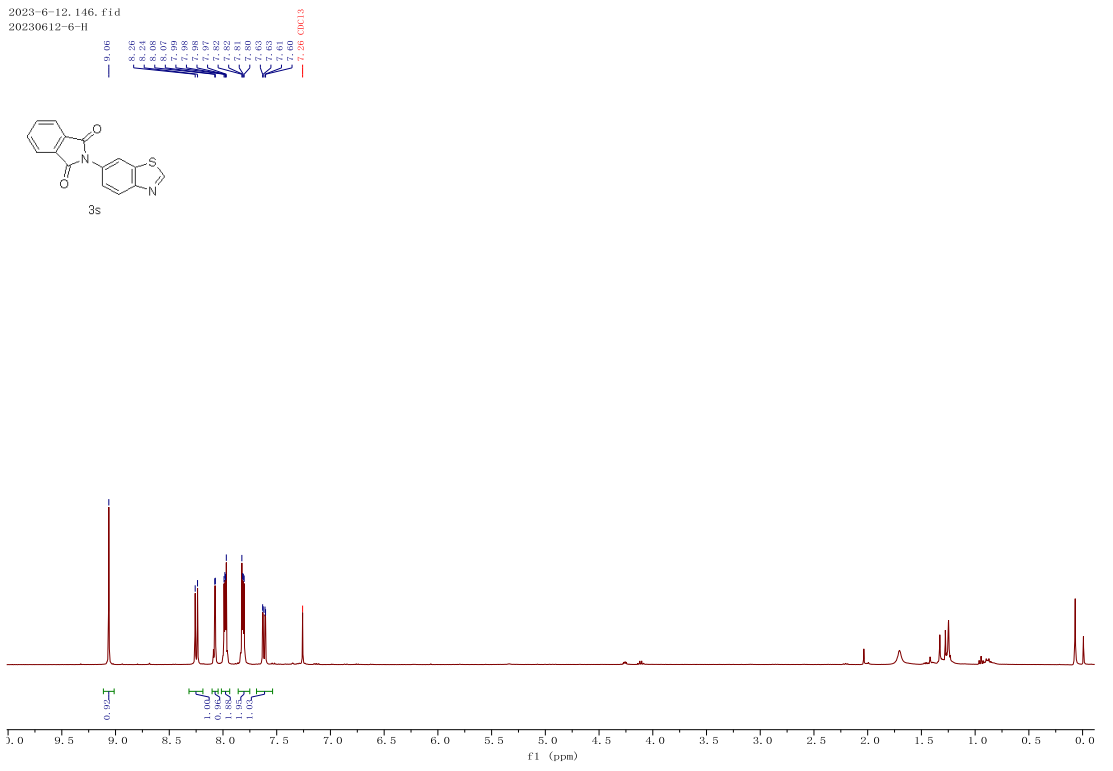

5. 10. fid

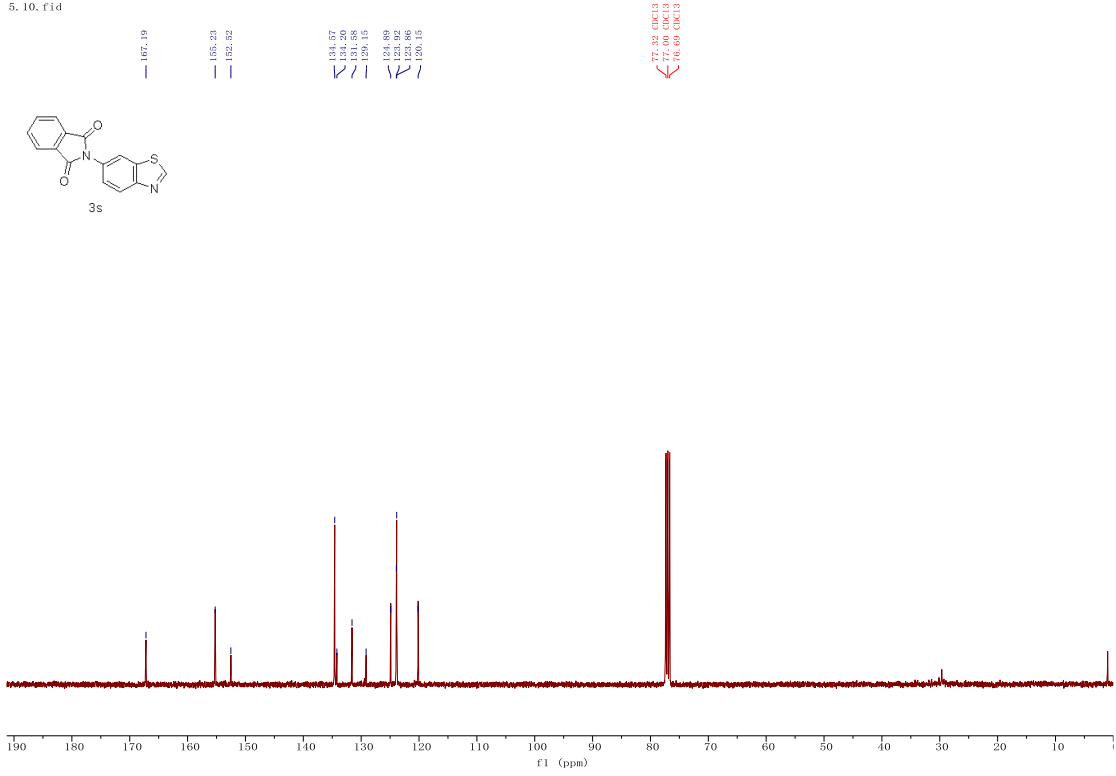

9-H. 10. fid

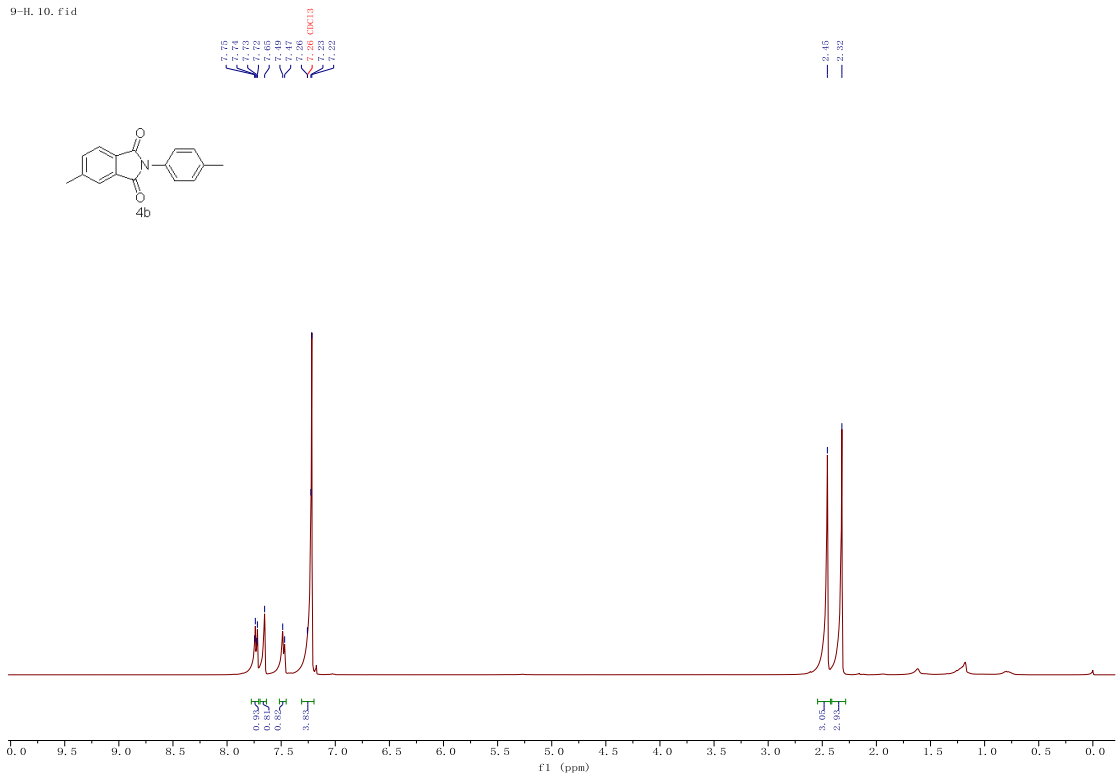

9-C. 10. fid

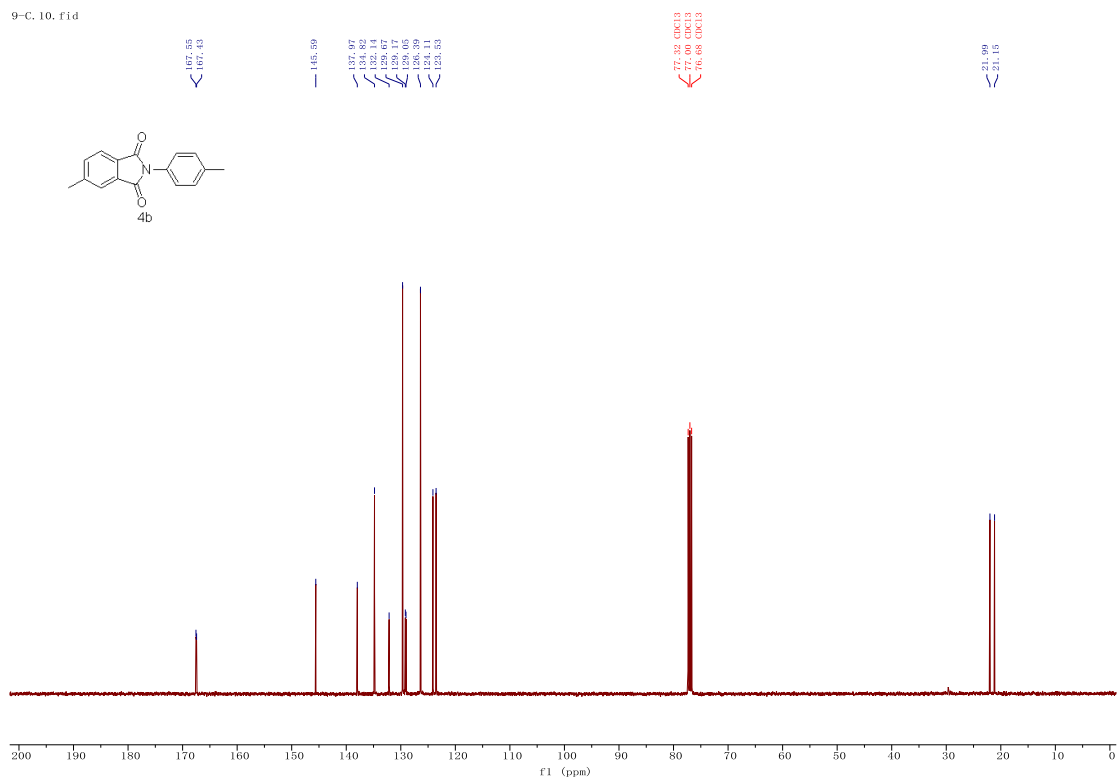

11-H. 10. fid

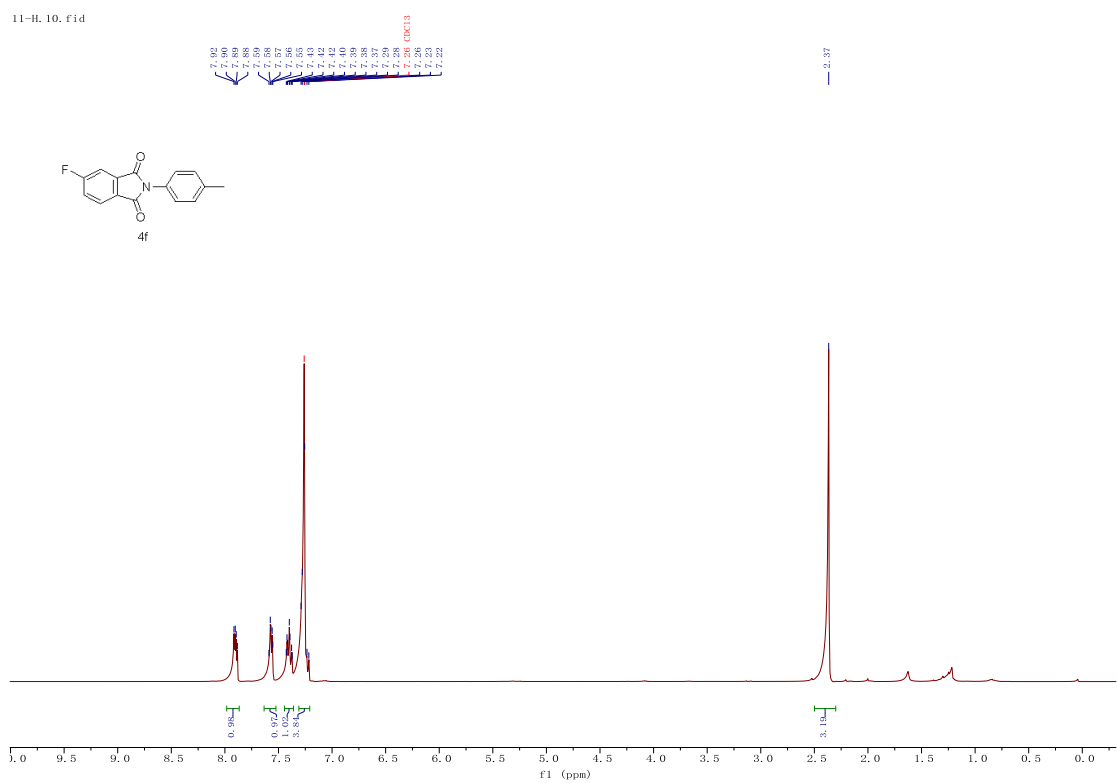

11-C. 10. f1d

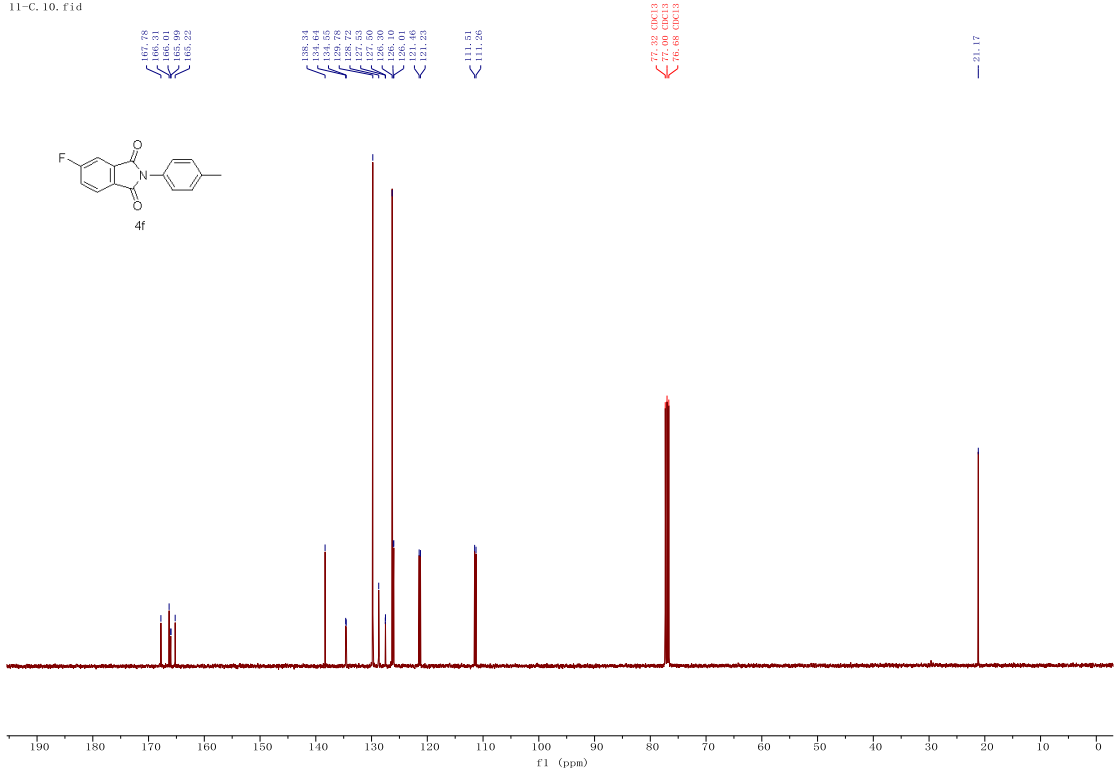

5.10.f1d

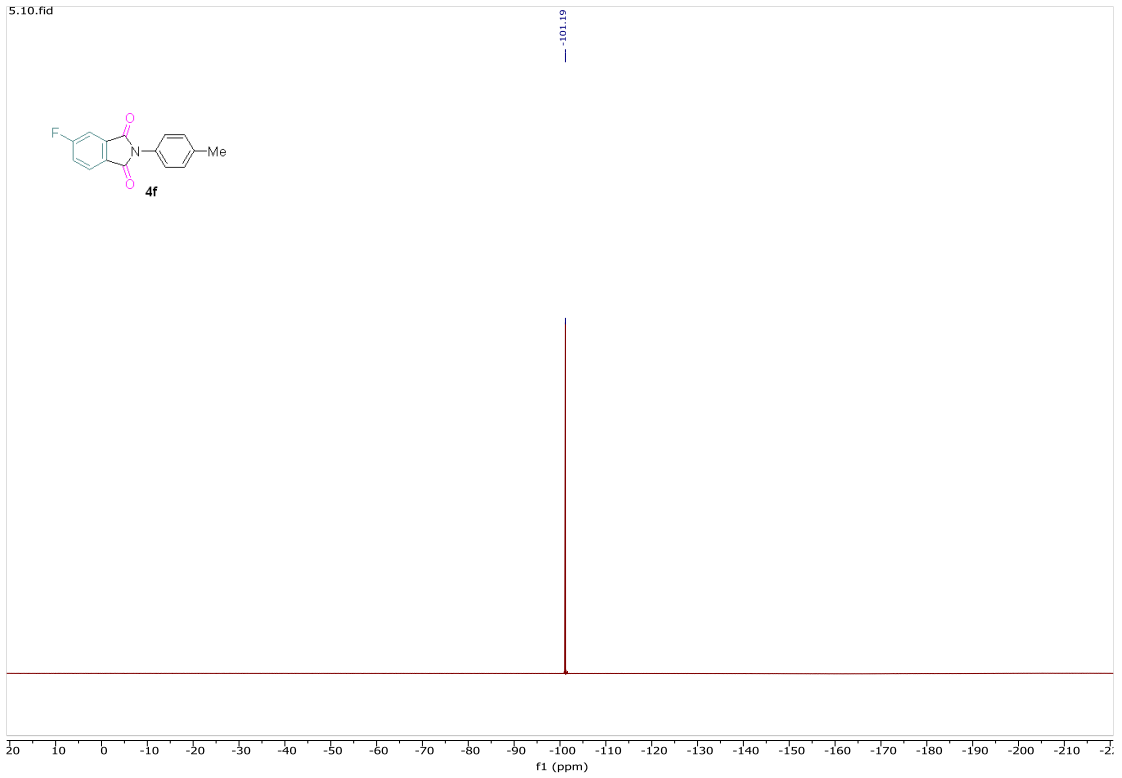

10-H, 10, f1d

7.982  
7.972  
7.951  
7.899  
7.872  
7.872  
7.796  
7.714  
7.714  
7.714  
7.622  
7.622  
7.511  
7.500  
7.494  
7.443  
1.736, 0.0013

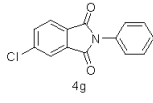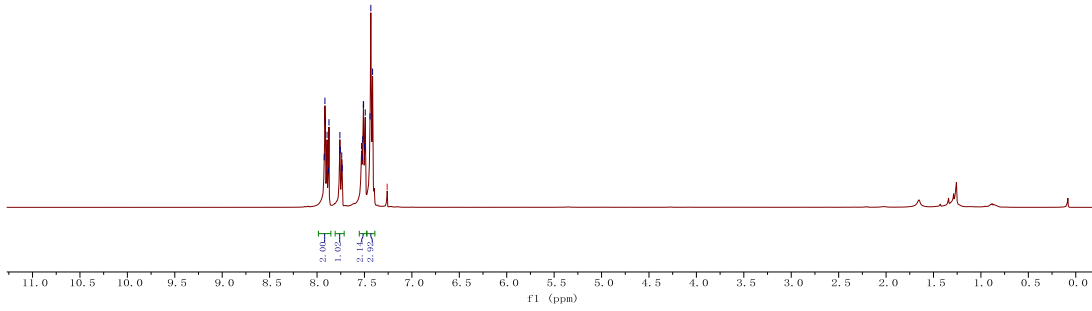

10-C, 10, f1d

166.25  
165.94

141.06  
134.43  
133.36  
129.75  
129.13  
128.91  
124.97  
124.11

77.32, 0.0013  
77.00, 0.0013  
76.68, 0.0013

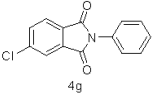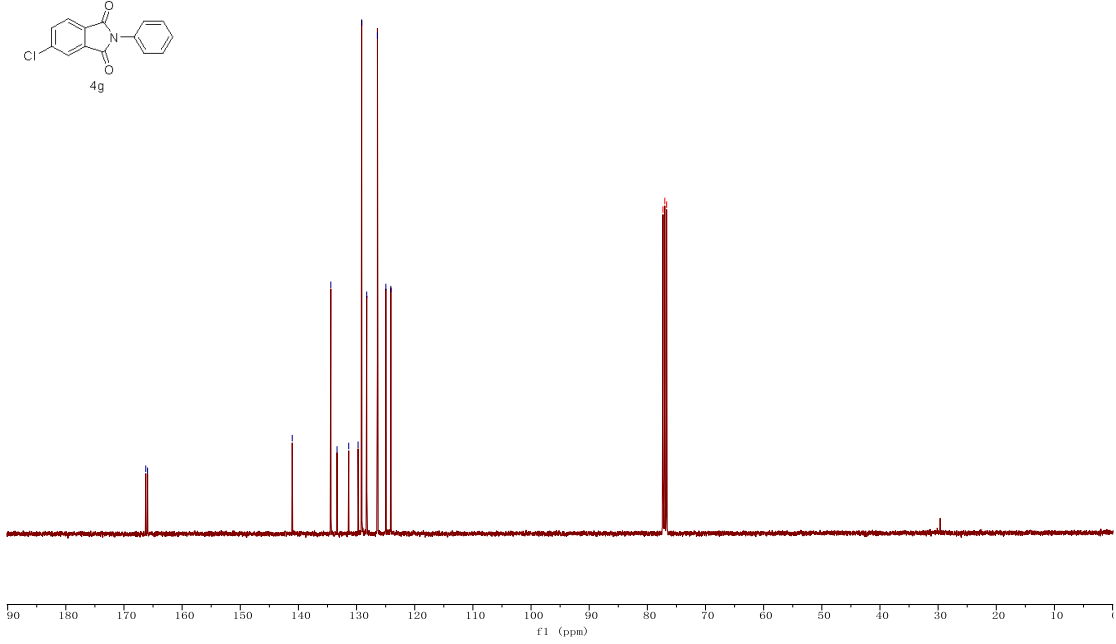

Supplement: d3cc04126c1.pdf [file d3cc04126c1.pdf]
